1 ***PerturbSci-Kinetics*: Dissecting key regulators of transcriptome kinetics through scalable single-cell**  
2 **RNA profiling of pooled CRISPR screens**

3  
4 Zihan Xu<sup>1,2</sup>, Andras Sziraki<sup>1,2</sup>, Jasper Lee<sup>1</sup>, Wei Zhou<sup>1,3</sup>, Junyue Cao<sup>1,3,4</sup>

5  
6 **Affiliations:**

7 <sup>1</sup>Laboratory of Single Cell Genomics and Population Dynamics, The Rockefeller University, New York,  
8 NY, USA

9 <sup>2</sup>The David Rockefeller Graduate Program in Bioscience, The Rockefeller University, New York, NY,  
10 USA

11  
12 <sup>3</sup>Senior author

13 <sup>4</sup>Lead Contact

14 \*Correspondence: [wzhou@rockefeller.edu](mailto:wzhou@rockefeller.edu) (W.Z.), [jcao@rockefeller.edu](mailto:jcao@rockefeller.edu) (J.C.)

15  
16 **Abstract**

17 Here we described *PerturbSci-Kinetics*, a novel combinatorial indexing method for capturing three-layer  
18 single-cell readout (*i.e.*, whole transcriptomes, nascent transcriptomes, sgRNA identities) across hundreds  
19 of genetic perturbations. Through *PerturbSci-Kinetics* profiling of pooled CRISPR screens targeting a  
20 variety of biological processes, we were able to decipher the complexity of RNA regulations at multiple  
21 levels (*e.g.*, synthesis, processing, degradation), and revealed key regulators involved in miRNA and  
22 mitochondrial RNA processing pathways. Our technique opens the possibility of systematically decoding  
23 the genome-wide regulatory network underlying RNA temporal dynamics at scale and cost-effectively.

## 24 Main

25 Cellular functions are determined by the expression of millions of RNA molecules, which are tightly  
26 regulated across several critical steps, such as RNA synthesis, splicing, and degradation. However, our  
27 knowledge regarding how critical molecular regulators affect genome-wide RNA kinetics remains limited.  
28 For example, recent studies have combined single-cell transcriptome analysis with pooled CRISPR  
29 screens to gain insights into the gene regulation mechanisms<sup>1-8</sup>. Yet, these methods provide only a  
30 snapshot of gene expression programs and fail to capture the complexity of RNA dynamics (*e.g.*, synthesis,  
31 splicing, and degradation). Although RNA metabolic labeling coupled with single-cell sequencing can  
32 reveal time-resolved transcriptomic dynamics, there is still a need for scalable tools that can efficiently  
33 characterize the impact of genetic perturbations on RNA dynamics in a high-throughput manner<sup>9</sup>. To  
34 resolve this challenge, we developed *PerturbSci-Kinetics*, which integrates CRISPR-based pooled genetic  
35 screen, highly scalable single-cell RNA-seq by combinatorial indexing, and metabolic labeling to recover  
36 single-cell transcriptome dynamics across hundreds of genetic perturbations.

37

38 The new method features a novel combinatorial indexing strategy (referred to as ‘*PerturbSci*’) for targeted  
39 enrichment and amplification of sgRNA transcripts that carries the same cellular barcode with the single-  
40 cell whole transcriptome (**Fig 1a**). In brief, we adopted the modified CROP-seq vector system<sup>5</sup> and  
41 developed a strategy for direct capture of sgRNA sequences<sup>6,7</sup>, through reverse transcription using a  
42 sgRNA-specific primer followed by targeted enrichment of sgRNA sequences via PCR (**Extended Data**  
43 **Fig 1a-b**). A comparison of chemistries between *PerturbSci* and other similar approaches (*e.g.*, CROP-  
44 seq<sup>5</sup>, and Direct-capture Perturb-seq<sup>7</sup>) is included in **Extended Data Fig 1c**. With extensive optimizations  
45 on the primer design and reaction conditions (**Extended Data Fig 2**), *PerturbSci* achieves a high capture  
46 rate of sgRNA (*i.e.*, up to 99.7%), comparable to previous approaches for single-cell profiling of pooled  
47 CRISPR screens<sup>1-7</sup>. Furthermore, built on an extensively improved single-cell RNA-seq by three-level  
48 combinatorial indexing (*i.e.*, EasySci-RNA<sup>10</sup>), *PerturbSci* substantially reduced the library preparation  
49 costs for single-cell RNA profiling of pooled CRISPR screens (**Fig 1b, Supplementary file 3**). In addition,  
50 to maximize the gene knockdown efficacy, we used *dCas9-KRAB-MeCP2*<sup>11</sup>, a highly potent dual-  
51 repressor dCas9 that outperforms conventional dCas9 repressors.

52

53 By integrating *PerturbSci* with 4-thiouridine (4sU) labeling method<sup>12</sup>, *PerturbSci-Kinetics* enables the  
54 capture of single-cell time-resolved nascent transcriptomes. Specifically, following 4sU labeling and *in-*  
55 *situ* thiol (SH)-linked alkylation reaction<sup>12-18</sup> (referred to as ‘chemical conversion’), the nascent  
56 transcriptome and the whole transcriptome from the same cell can be distinguished by T to C conversions  
57 in reads mapping to mRNAs<sup>19</sup>. The kinetic rates of mRNA (*e.g.*, synthesis and degradation) were then  
58 inferred for each genetic perturbation (**Fig 1a, Methods**). Notably, *PerturbSci-Kinetics* exhibits orders of  
59 magnitude higher throughput than previous metabolic labeling-coupled single-cell RNA-seq approaches  
60 (*e.g.*, scEU-seq, sci-fate, scNT-seq)<sup>19-23</sup> (**Fig 1a**). We extensively optimized the cell fixation condition to  
61 reduce the cell loss during cell permeabilization and chemical conversion (**Extended Data Fig 3a-e**). We  
62 also optimized the computational pipeline for nascent reads calling<sup>19</sup>, enabling the identification of single  
63 cell nascent transcriptomes with higher accuracy (**Extended Data Fig 4**). Statistical benchmarking with  
64 other published datasets<sup>19</sup> further validated the data quality (**Extended Data Fig 3h-i**).

65

66 As a proof of concept, we generated a human HEK293 cell line with the inducible expression of dCas9-  
67 KRAB-MeCP2<sup>11</sup> (HEK293-idCas9), then transduced cells with a non-target control (NTC) sgRNA  
68 (sgNTC) or a sgRNA targeting *IGF1R* (sgIGF1R). The induction of dCas9 expression after Dox treatment  
69 and the high knockdown efficiency on the target gene were validated by single-cell RNA-seq, RT-qPCR  
70 and flow cytometry (**Fig 1c, Extended Data Fig 5**). By profiling a 1:1 mixed cell pool consisting of  
71 human HEK293-idCas9-sgIGF1R cells and mouse 3T3-CRISPRi-sgFto cells, we recovered 94.1% of  
72 singlets with both species-specific whole transcriptomes and sgRNAs (**Fig 1d, Extended Data Fig 2l**),  
73 validating the purity of the single-cell transcriptomes and sgRNAs co-captured by *PerturbSci*.

74  
75 We next sought to validate the ability of *PerturbSci-Kinetics* to capture three-layer readout (*i.e.*, whole  
76 transcriptomes, nascent transcriptomes, sgRNA identities) at the single-cell level. Following 4sU labeling  
77 (200uM for two hours), we mixed HEK293-idCas9-sgNTC cells and sgIGF1R cells for fixation and  
78 chemical conversion. A significant enrichment of T to C mismatches in mapped reads of the chemical  
79 conversion group was observed, similar to our previous study<sup>19</sup> (**Fig 1e**). A median of 22.1% of newly  
80 synthesized reads was recovered in labeled and chemically converted cells, compared to only 0.8% in the  
81 control group (**Fig 1f**). Reassuringly, the proportion of reads mapped to exonic regions was significantly  
82 lower in nascent reads compared with pre-existing reads (p-value < 1e-20, Tukey's test after ANOVA)  
83 (**Fig 1g, Extended Data Fig 3g**). Indeed, genes with a higher fraction of nascent reads were significantly  
84 enriched in highly dynamic biological processes such as transcription coregulator activity (FDR = 5.7e-  
85 12) and protein kinase activity (FDR = 2.6e-08)<sup>24</sup> (**Fig 1h**). By contrast, genes with a lower fraction of  
86 nascent reads were strongly enriched for processes essential for cell vitality, such as the structural  
87 constituent of ribosome (FDR = 1.5e-42), unfolded protein binding (FDR = 4.5e-11), and translation  
88 regulator activity (FDR = 8.2e-10) (**Fig 1i**). Notably, the chemical conversion step is fully compatible  
89 with sgRNA detection at single-cell resolution: we recovered sgRNAs from 97% of chemically converted  
90 cells (a median of 62 sgRNA UMIs/cell), 92.6% of which were annotated as sgRNA singlets (**Fig 1j-k**).  
91 These analyses demonstrate the capacity of *PerturbSci-Kinetics* to profile both transcriptome dynamics  
92 and the associated perturbation identities at the single-cell level.

93

94

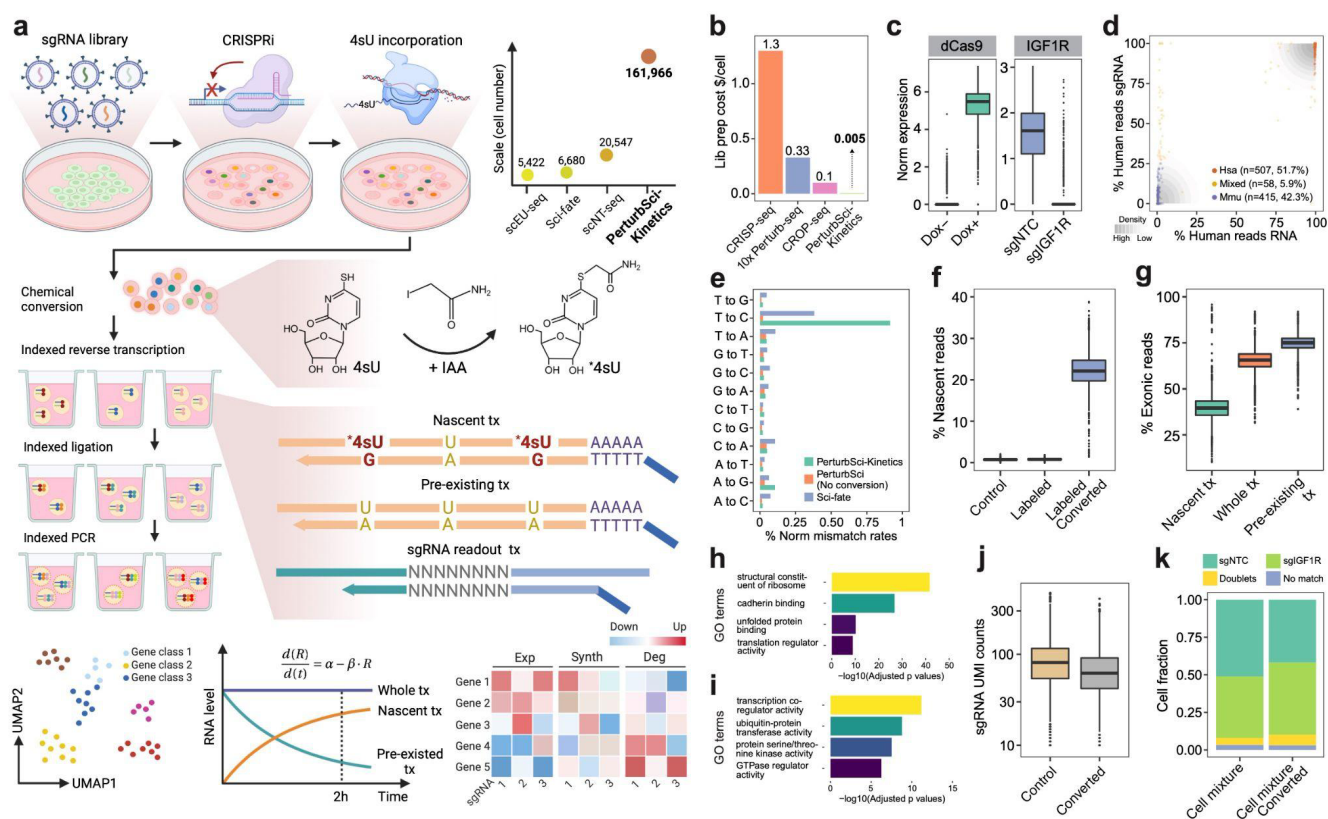

95

96

97

98

99

100

101

102

103

104

105

106

107

108

109

110

111

112

113

114

115

116

117

118

**Fig. 1. PerturbSci-Kinetics enables joint profiling of transcriptome dynamics and high-throughput gene perturbations by pooled CRISPR screens.** **a.** Scheme of the experimental and computational strategy for *PerturbSci-Kinetics*. The dot plot on the upper right shows the number of cells profiled in this study for comparison with the published single-cell metabolic profiling datasets<sup>19,22,23</sup>. Scale, the highest number of cells profiled in a single experiment of each technique. IAA, iodoacetamide. \*4sU, chemically modified 4sU. R, steady-state RNA level.  $\alpha$ , RNA synthesis rate.  $\beta$ , RNA degradation rate. Exp, steady-state expression. Synth, synthesis rate. Deg, degradation rate. **b.** Bar plot showing the estimated library preparation cost for *PerturbSci-Kinetics* and other published techniques<sup>25,26</sup> for single-cell transcriptome analysis coupled with CRISPR screens. **c.** The left box plot shows the normalized expression of dCas9-KRAB-MeCP2 in untreated or Dox-induced HEK293-idCas9 cells. The right box plot shows the normalized expression of IGF1R in Dox-induced HEK293-idCas9 cells transduced with sgNTC or sgIGF1R. Gene counts of each single cell were normalized by the total gene count, multiplied by 1e4 and then log-transformed. **d.** An equal number of induced HEK293-idCas9-sgIGF1R cells and 3T3-CRISPRi-sgFto cells were mixed after cell collection and were profiled using *PerturbSci*. The scatter plot displays the percentage of single-cell transcriptome reads that were mapped to the human genome on the x-axis, and the percentage of single-cell sgRNA reads that were mapped to the human cell-specific sgRNA on the y-axis. The shading represents the density of dots. **e.** Bar plot showing the normalized percentage of all possible single base mismatches in reads from sci-fate (blue), and *PerturbSci-Kinetics* on chemically converted (green) or unconverted cells (orange). Normalized mismatch rates, the percentage of each type of mismatch in all sequencing bases. **f.** Box plot showing the fraction of recovered nascent reads in single-cell transcriptomes across conditions: no 4sU labeling + no chemical conversion, 4sU labeling + no chemical conversion, and 4sU labeling + chemical conversion. **g.** Box plot showing the ratio of reads mapped to exonic regions of the genome in nascent reads, pre-existing reads, and reads of the whole

119 transcriptomes across single cells. **h-i.** Bar plots showing the significantly enriched Gene Ontology (GO)  
120 terms in the list of genes with low (h) or high (i) nascent reads fractions (**Methods**). **j.** Box plot showing  
121 the number of unique sgRNA transcripts detected per cell in cells with or without the chemical conversion.  
122 **k.** We performed *PerturbSci-Kinetics* experiment using converted/unconverted HEK293-idCas9 cells  
123 transduced with sgNTC/sgIGF1R. Stacked bar plot showing the fraction of converted/unconverted cells  
124 identified as sgNTC/sgIGF1R singlets, doublets, and cells with no sgRNA detected.  
125

126 To dissect the impact of key genetic regulators on transcriptome kinetics, we performed a *PerturbSci-*  
127 *Kinetics* screen on HEK293-idCas9 cells transduced with a library of 699 sgRNAs, which contains 15  
128 NTC sgRNAs and sgRNAs targeting 228 genes involved in a variety of biological processes such as  
129 mRNA transcription, processing, degradation (**Fig 2a, Supplementary Table 1**). The cloning and  
130 lentiviral packaging were carried out in a pooled fashion, similar to the previous report<sup>27</sup> (**Methods**). We  
131 then infected the HEK293-idCas9 cell line with the sgRNA lentiviral library at a low multiplicity of  
132 infection (MOI) (2 repeats at MOI = 0.1 and 2 repeats at MOI = 0.2) to ensure that most cells received  
133 only one sgRNA. After a 5-day puromycin selection to remove untransduced cells, we harvested a fraction  
134 of cells for bulk library preparation ('day 0' samples). The rest of cells were treated with 1ug/ml  
135 Doxycycline (Dox) to induce the dCas9-KRAB-MeCP2 expression for an additional seven days. At the  
136 end of the screen, we introduced 4sU labeling (200uM for two hours) and harvested samples for both bulk  
137 screen and single-cell *PerturbSci-Kinetics* library preparation ('day 7' samples). The time window for the  
138 screening period was chosen to ensure sufficient knockdown efficiency and establish new transcriptomic  
139 steady states<sup>28</sup>, as well as to minimize the effect of population dropout<sup>8</sup> (**Methods**).

140  
141 As anticipated, activated CRISPRi significantly altered sgRNAs abundance in the pool, which was  
142 consistent between replicates and concordant with the previous study<sup>29</sup> (**Extended Data Fig 6a-b,**  
143 **Supplementary Table 2, 3**). For example, sgRNAs-targeting genes involved in essential biological  
144 functions, such as DNA replication, ribosome assembly, and rRNA processing, were strongly depleted  
145 after the screen (**Extended Data Fig 6c**). Reassuringly, the sgRNA abundance recovered by *PerturbSci-*  
146 *Kinetics* significantly correlated with the bulk screen libraries (Pearson correlation  $r = 0.988$ ,  $p$ -value  $<$   
147  $2.2e-16$ ) (**Fig 2b**).

148  
149 After filtering out low-quality cells, we recovered 161,966 labeled cells, 88% of which had matched  
150 sgRNAs ( $\geq 10$  sgRNA UMIs). A majority (78%) of these matched cells were annotated as sgRNA  
151 singlets (**Extended Data Fig 7a**). Despite the shallow sequencing (duplication rate of 17.9%), we obtained  
152 a median of 2,155 UMIs per cell. Most (698 out of 699) sgRNAs were recovered, with a median of 28  
153 sgRNA UMIs detected per cell. sgRNAs with low knockdown efficiencies ( $\leq 40\%$  expression reduction  
154 of target genes compared with NTC) were further filtered out (**Extended Data Fig 7b-e**). Of note, the  
155 knockdown efficiencies of several individual sgRNAs were further examined using RT-qPCR, which  
156 showed high consistency with the pooled screen (**Extended Data Fig 7f**). Finally, 98,315 cells were  
157 retained for downstream analysis, corresponding to a median of 484 cells per gene perturbation with a  
158 median of 67.7% knockdown efficiency of target genes (**Fig 2c**).

159  
160 Taking advantage of the ability of *PerturbSci-Kinetics* to capture multiple layers of information, we  
161 quantified gene-specific synthesis and degradation rates in each perturbation based on an ordinary  
162 differential equation<sup>30</sup> (**Methods**). As CRISPRi is known to function through transcriptional  
163 repression<sup>31,32</sup>, we first examined the kinetic changes of sgRNA target genes upon perturbation. Indeed,  
164 these genes exhibited strongly reduced synthesis rates while their degradation rates were only mildly  
165 affected (**Fig 2c**). As a further validation of the technique, we observed significantly higher correlations  
166 among sgRNAs targeting the same genes in multiple layers (*e.g.*, whole/nascent transcriptome,  
167 synthesis/degradation rates, **Extended Data Fig 8a**).

168

169 To further understand the impact of gene perturbations, we aggregated whole transcriptomes of each gene  
170 perturbation, followed by PCA for dimension reduction and UMAP visualization<sup>33</sup>(**Methods**). Indeed,  
171 perturbations targeting paralogous genes (*e.g.*, *EXOSC5* and *EXOSC6*; *CNOT2* and *CNOT3*) or related  
172 biological processes (*e.g.*, RNA degradation, RNA splicing, oxidative phosphorylation (OXPHOS) and  
173 energy metabolism) were readily clustered together in the low dimension space (**Fig 2d**). Reassuringly,  
174 UMAP embedding on gene-specific synthesis/degradation rates also grouped perturbations by their  
175 functions (**Extended Data Fig 8b-c**).

176  
177 We then investigated the impact of genetic perturbations on global transcriptome dynamics (*i.e.*, synthesis,  
178 splicing, and degradation) (**Fig 2e-g, Extended Data Fig 9, Methods, Supplementary Table 4, 5**). As  
179 expected, the knockdown of genes involved in transcription initiation (*e.g.*, *GTF2E1*, *TAF2*, *MED21*, and  
180 *MNAT1*), mRNA synthesis (*e.g.*, *POLR2B* and *POLR2K*), and chromatin remodeling (*e.g.*, *SMC3*, *RAD21*,  
181 *CTCF*, *ARID1A*) significantly downregulated the global synthesis rates but not the degradation rates (**Fig**  
182 **2e-f**). In contrast, perturbations targeting components of critical biological processes such as DNA  
183 replication (*e.g.*, *POLA2*, *POLD1*), ribosome synthesis and rRNA processing (*e.g.*, *POLR1A*, *POLR1B*,  
184 *RPL11*, *RPS15A*), mRNA and protein processing (*e.g.*, *CNOT2*, *CNOT3*, *CCT3*, *CCT4*) substantially  
185 reduced both RNA synthesis and degradation globally, indicating a compensatory mechanism for  
186 maintaining overall transcriptome homeostasis (**Fig 2e-f, Extended Data Fig 9a-b**). Furthermore, we  
187 observed significantly reduced exonic reads fractions in nascent transcriptomes, an indicator of  
188 dysregulated splicing dynamics, following perturbations of genes involved in the main steps of RNA  
189 processing, including 5' capping (*e.g.*, *NCBPI*), RNA splicing (*e.g.*, *LSM2*, *LSM4*, *PRPF38B*, *HNRNPK*),  
190 and 3' cleavage/polyadenylation (*e.g.*, *CPSF2*, *CPSF6*, *NUDT21*, *CSTF3*) (**Fig 2g, Supplementary Table**  
191 **6**). In addition, knocking down genes related to OXPHOS & energy metabolism (*e.g.*, *GAPDH*, *NDUFS2*,  
192 *ACO2*) also significantly reduced the exonic reads ratio in nascent reads (**Fig 2g, Extended Data Fig 9c**),  
193 potentially because the mRNA processing is highly energy-dependent<sup>34-36</sup>.

194  
195 Interestingly, we found the knockdown of *AGO2*, a well-established post-transcriptional silencer<sup>37</sup>,  
196 resulted in an significant increase of the global synthesis (**Fig 2e**), suggesting its direct involvement in  
197 global transcription regulation. To validate this finding, we first examined Ago2 ChIP-seq data and bulk  
198 RNA-seq data upon shRNA-mediated silencing of *AGO2* from ENCODE<sup>38,39</sup>. We observed a group of  
199 genes with strong Ago2 binding in close proximity to their transcription start sites (TSS) (**Extended Data**  
200 **Fig 10a**), and these genes were significantly upregulated upon *AGO2* silencing, consistent with the  
201 transcription repressor role of *AGO2* identified in our study (**Extended Data Fig 10b**). Moreover, we  
202 observed the enrichment of Ago2 binding right downstream of TSS (**Extended Data Fig 10a**), reflecting  
203 a potential role of Ago2 in regulating transcriptional pausing. To infer the gene-specific transcriptional  
204 pausing state, we analyzed another published GRO-seq dataset and quantified gene-specific Pausing Index  
205 (PI)<sup>40,41</sup> (**Methods**). Remarkably, a strong positive association between *AGO2* TSS binding and PI across  
206 genes was observed (**Extended Data Fig 10c-d**). We sought to further validate this mechanism by tracking  
207 on-going transcription. Following the construction of HEK293-idCas9-sgAGO2 cell line and 7-day Dox  
208 induction, we performed 20min short-term 4sU labeling and full-coverage SLAM-seq<sup>42</sup> (**Methods**).  
209 *AGO2* knockdown significantly upregulated 78 highly-paused genes, and their nascent RNA exhibited  
210 increased 3' end coverage upon *AGO2* knockdown (**Extended Data Fig 10e-f**), indicating more efficient

211 transcriptions. Together, our integrated analyses strongly supported the non-canonical role of AGO2 in  
212 transcription identified by *PerturbSci-Kinetics*.

213  
214 We next sought to investigate regulators of mitochondrial RNA dynamics by quantifying the fraction of  
215 nascent read counts for mitochondrial genes (referred to as “mitochondrial transcriptome turnover”)  
216 (**Methods**). Notably, we observed a significantly reduced turnover of mitochondrial transcriptome  
217 following the perturbation of multiple metabolism-related genes (*e.g.*, *GAPDH*, *FH*, *PKM* involved in  
218 glycolysis, *ACO2*, and *IDH3A* involved in the TCA cycle, *NDUFS2* and *COX6B1* involved in oxidative  
219 phosphorylation) (**Fig 2h, Extended Data Fig 9d, Supplementary Table 7**). Furthermore, the  
220 knockdown of *LRPPRC* introduced the most substantial defect in the mitochondrial turnover and  
221 expression levels of all mitochondrial protein-coding genes (**Fig 2h, Extended Data Fig 11a**). By  
222 examining mitochondrial gene-specific kinetics, we identified 5 of 13 mitochondrial protein-coding genes,  
223 including *MT-CO1*, *MT-ATP8*, *MT-ND4*, *MT-CYB*, and *MT-ATP6*, to be significantly regulated by both  
224 decreased synthesis and increased degradation (**Extended Data Fig 11a, Supplementary Table 8**).

225  
226 To further validate our findings, we examined the bulk RNA-seq and the RNase footprinting datasets from  
227 *Lrpprc* knockout mice<sup>43</sup>. While steady-state mitochondrial gene down-regulation showed great  
228 consistency across species, we further observed the strong relationship between mitochondrial mRNA  
229 stability and RNA secondary structure, potentially indicating the RNA stabilizing mechanism of LRPPRC  
230 (**Extended Data Fig 11b**). Moreover, the strong activation of integrated stress response (ISR) phenotype  
231 in LRPPRC knockdown cells enforced the essentiality of LRPPRC in maintaining mitochondrial mRNA  
232 homeostasis (**Extended Data Fig 11c-f**). By profiling HEK293-idCas9-sgLRPPRC cells following Dox  
233 induction and 4sU labeling, we further validated the robustness of kinetics changes of mitochondrial  
234 mRNA upon LRPPRC perturbation (**Extended Data Fig 10g-i**). It is worth noting that impaired  
235 mitochondrial gene expression and the functional defect of mitochondria in brown adipocytes specific  
236 LRPPRC knockout mice were reported in a recent study<sup>44</sup>. Overall, *PerturbSci-Kinetics* identified  
237 LRPPRC as a key regulator of mitochondrial RNA dynamics.

238  
239 Extending the above analysis, we identified differentially-expressed genes (DEGs) across perturbations  
240 (**Supplementary Table 9**) and examined their dynamic rate changes (**Supplementary Table 10**)  
241 (**Methods**). Out of 14,618 perturbation-DEGs pairs, 22.9% exhibited significant dynamics rate changes:  
242 15.1% showed synthesis rate changes only, 3.6% showed degradation rate changes only, and 4.2% showed  
243 changes on both, suggesting that RNA dynamics control is highly involved in gene regulation<sup>45</sup>. As  
244 expected, degradation-regulated DEGs were highly associated with perturbations on mRNA  
245 surveillance/processing genes (*e.g.*, *UPF1*, *UPF2*, *SMG5*, *SMG7* in nonsense-mediated mRNA decay  
246 pathway; *EXOSC2*, *EXOSC5*, *EXOSC6* in RNA exosome; *CSTF3*, *CPSF2*, *CPSF6*, *NUDT21*, *XRN2* for  
247 3' polyadenylation; *RNMT*, *NCBP1* related to 5' RNA capping) (**Fig 2i**). For instance, our study identified  
248 a set of significantly overlapped DEGs upon knockdown of *DROSHA* and *DICER1*<sup>46,47</sup>, two crucial  
249 regulators in the miRNA biogenesis pathway<sup>48</sup>. By concurrently profiling gene-specific expression and  
250 dynamics, we discovered that these differentially expressed genes were regulated through distinct  
251 mechanisms: some genes were regulated through decreased degradation (*e.g.*, miRNA-mediated silencing  
252 complex (RISC) components: TNRC6A and TNRC6B), while others are through increased transcription  
253 (*e.g.*, miRNA host genes: MIR181A1HG, FTX; genes involved in miRNA biogenesis: DDX3X) (**Fig 2j-**



254 **l, Extended Data Fig 12a-c).** To reveal the direct involvement of miRNA-mediated RNA destabilization  
255 in regulating these degradation-regulated DEGs, we visualized the mRNA transcripts binding patterns of  
256 *Ago2*, a core component of RISC for targeted mRNA binding and degradation<sup>49</sup>. As expected, *Ago2*  
257 binding was strongly enriched in the 5' and 3' untranslated region (UTR) of transcripts from genes with  
258 reduced degradation but not in transcripts from genes with upregulated synthesis (**Fig 2m**), consistent with  
259 prior studies that miRNA induces targeted RNA degradation and translation repression mainly through  
260 binding to UTRs<sup>46,50</sup>.

261  
262 As validation, we profiled HEK293-idCas9 cells transduced with sgRNA targeting each of the four  
263 miRNA biogenesis pathway genes (*XPO5*, *AGO2*, *DROSHA*, *DICER1*) after Dox induction and 4sU  
264 labeling. Both single-cell transcriptome UMAP embedding and RNA dynamics changes recapitulated our  
265 findings in the pooled screen (**Extended Data Fig 12d-f**). In addition, by using 4sU chase labeling and  
266 3'end bulk SLAM-seq<sup>42</sup>, we tracked RNA degradation dynamics in *DROSHA* and *DICER1* knockdown  
267 cells and confirmed the enhanced stability of mRNA from degradation-regulated genes (e.g., *SHCBP1*,  
268 *PRTG*), compared to transcription-related genes (e.g., *FTX*, *YYIAP1*) (**Fig 2l, n, Extended Data Fig 12g**).  
269 These analyses further demonstrate the unique capacity of *PerturbSci-Kinetics* of deciphering the  
270 regulatory mechanisms (degradation vs. transcription) involved in gene expression changes.

271  
272 Finally, to explore cell-state dependent RNA dynamics changes upon genetic perturbations at the sub-  
273 population level, we investigated the effects of perturbations on RNA dynamics throughout the cell cycle  
274 using our validation dataset, in which we profiled more cells with deeper sequencing. Using a combination  
275 of cell cycle-related genes<sup>51</sup> and cell cycle-related transcription factors<sup>19</sup> for dimension reduction and  
276 clustering, we separated cells into five clusters representing different cell cycle stages (**Extended Data**  
277 **Fig 13a-c**). Gene-specific synthesis and degradation rates in the physiological condition were inferred  
278 across cell cycle stages in NTC cells, and four gene clusters with different cell cycle-dependent synthesis  
279 dynamics were identified<sup>52</sup> (**Extended Data Fig 13d**). Among clusters, only genes in cluster 1 exhibited  
280 a cell cycle stage-specific expression pattern. While their synthesis and degradation rates both increased  
281 with the cell cycle progression, their synthesis rates outpaced the degradation rates, driving the increase  
282 of their steady-state mRNA levels from S to G2M stage (**Extended Data Fig 13d**). GO term enrichment  
283 analysis confirmed the strong association between functions of these genes and cell division<sup>53</sup> (**Extended**  
284 **Data Fig 13e**).

285  
286 However, in *DROSHA* and *DICER1* knockdown cells, while the steady-state expression pattern of cluster  
287 1 genes resembled NTC along the cell cycle, degradation rates of these genes failed to respond, especially  
288 in the early phase of the cell cycle (**Extended Data Fig 13f**). Surprisingly, it was fully compensated by  
289 the reduced synthesis rates (**Extended Data Fig 13f**), suggesting the existence of synthesis-degradation  
290 feedback loops for gene regulation. As a result of this buffering effect, both *DROSHA* and *DICER1*  
291 knockdown did not substantially affect the cell-cycle progression (**Extended Data Fig 13b**). In  
292 comparison, the knockdown of *LRPPRC* did not impair the RNA degradation dynamics of these genes  
293 throughout the cell cycle progression (**Extended Data Fig 13g**), which is consistent with our conclusion  
294 that *LRPPRC* primarily affects mitochondrial mRNA stability (**Extended Data Fig 10d**). Together, our  
295 findings reveal the highly coordinated RNA synthesis-degradation regulations and the existence of  
296 feedback loops between RNA synthesis and degradation throughout the cell cycle.

297

298 In summary, *PerturbSci-Kinetics* is the first method that allows for the quantitative analysis of the  
299 genome-wide mRNA kinetic rates across hundreds of genetic perturbations in a single experiment. We  
300 have provided step-by-step protocols and data processing pipelines in supplementary files  
301 (**Supplementary file 1-4**) to facilitate the broad applications of the technique. Of note, there are several  
302 potential limitations to consider: First, long-term 4sU labeling might alter cell states and hinder the  
303 identification of sgRNA sequences. We thus chose a relatively short-term (2 hours) treatment to minimize  
304 such effects. Second, RNA dynamics identified by *PerturbSci-Kinetics* may not directly indicate causality  
305 in gene regulation, partly due to the long duration of CRISPRi-based gene knockdown. This limitation  
306 could be mitigated by coupling the technique with large-scale chemical perturbations that allow short  
307 treatment and labeling time.

308

309 Despite these limitations, our results uncover the unique advantages of *PerturbSci-Kinetics* over  
310 conventional assays. Its multi-layer readout offers a comprehensive view of gene expression and RNA  
311 dynamics in response to genetic perturbations, facilitating high-throughput and parallel characterization  
312 of regulators of gene-specific transcription, splicing, and degradation. Moreover, the low-cost and the high  
313 sgRNA capture sensitivity of *PerturbSci* allows for systematic characterization of cell-type-specific gene  
314 regulatory networks in various biological contexts at an unprecedented scale and resolution both *in vitro*  
315 and *in vivo*.

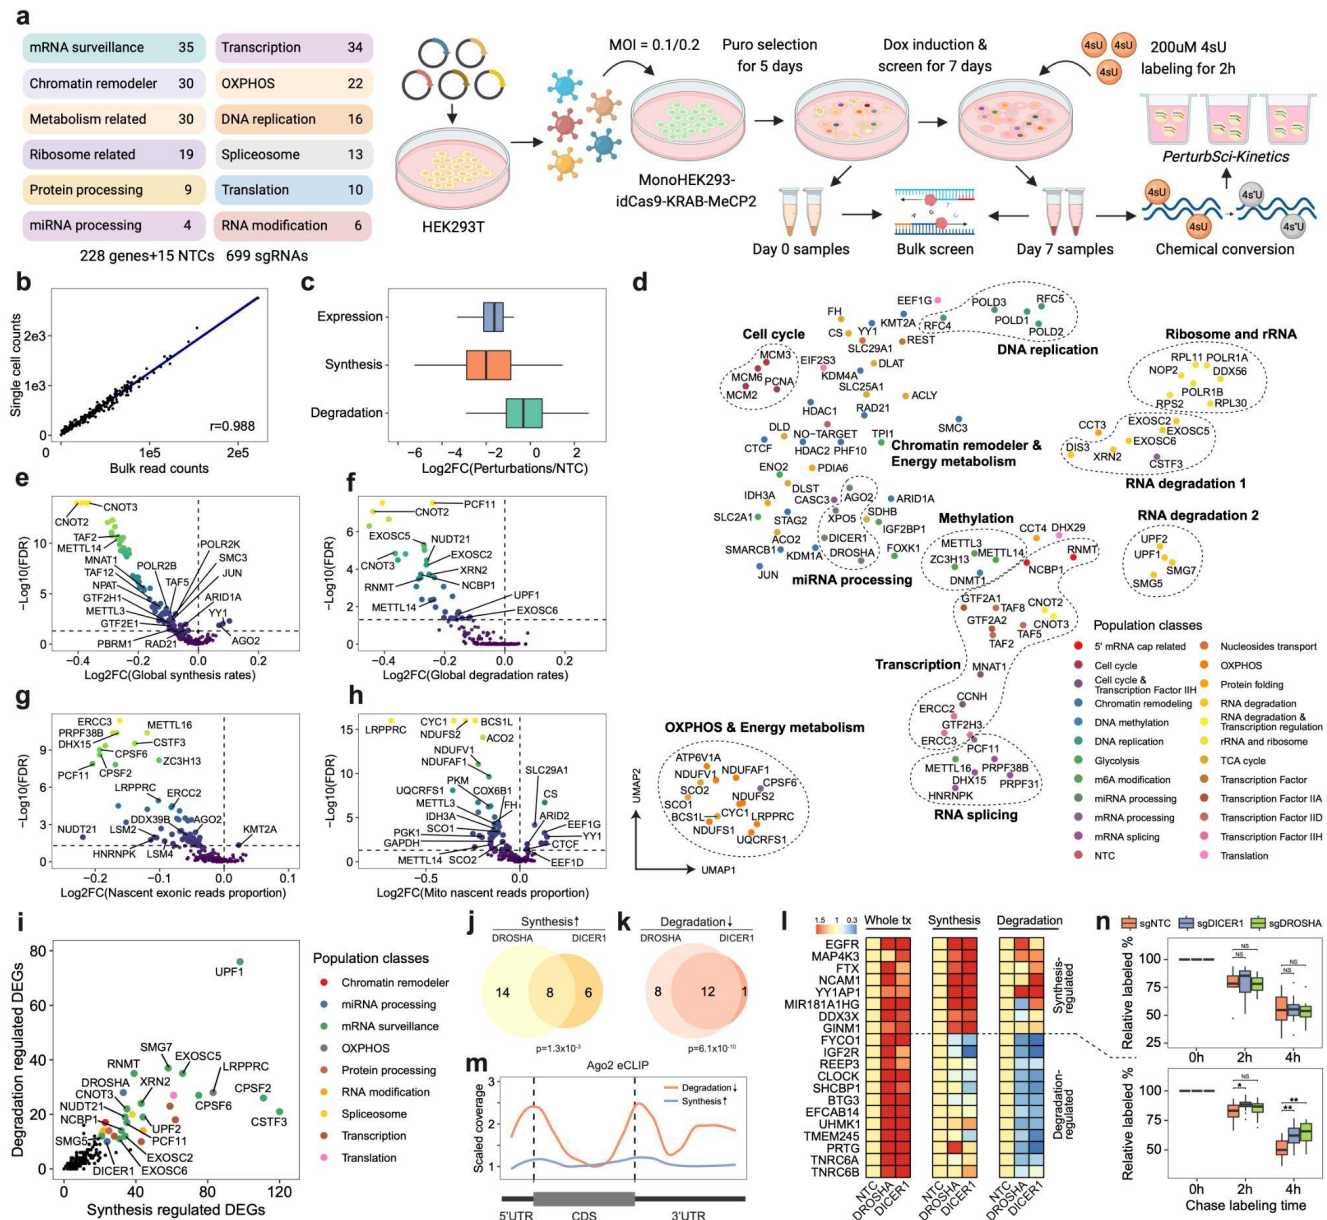

316

317

318

319

320

321

322

323

324

325

326

327

328

329

330

**Fig 2. Characterizing the impact of genetic perturbations on gene-specific transcriptional and degradation dynamics with *PerturbSci-Kinetics*.** **a.** Scheme of the experimental design of the *PerturbSci-Kinetics* screen. The main steps are described in the text. **b.** The scatter plot shows the correlation between perturbation-associated cell count from *PerturbSci-Kinetics* and sgRNA cell counts from bulk screen libraries. **c.** Box plot showing the log<sub>2</sub> transformed fold changes of gene expression, synthesis rates, and degradation rates of sgRNA-targeted genes in perturbed cells expressing the corresponding sgRNA, compared to NTC. **d.** UMAP visualization of perturbed pseudobulk whole transcriptomes profiled by *PerturbSci-Kinetics*. We aggregated single-cell transcriptomes in each perturbation, followed by dimension reduction using PCA and visualization using UMAP. Population classes, the functional categories of genes targeted in different perturbations. **e-h.** Scatter plots showing the extent and the significance of changes on the distributions of global synthesis (e), degradation (f), proportions of exon reads in the nascent transcriptome (g), and proportions of mitochondrial nascent reads (h) upon perturbations compared to NTC cells. The fold changes were calculated by dividing the median values of each perturbation with that of NTC cells and were log<sub>2</sub> transformed. **i.** Scatter plot

331 showing the number of synthesis/degradation-regulated DEGs from different perturbations. nDEGs: the  
332 number of DEGs. **j-k.** Venn diagrams showing the number of merged DEGs with significantly enhanced  
333 synthesis (j) or impaired degradation (k) between *DROSHA* and *DICER1*. Based on statistical test results,  
334 merged DEGs of *DROSHA* and *DICER1* perturbations were classified into synthesis-regulated genes (*i.e.*,  
335 the upregulation of these genes was mainly driven by increased synthesis rates) and degradation-regulated  
336 genes (*i.e.*, the upregulation of these genes were mainly driven by reduced degradation rates). Merged  
337 DEGs with p-value  $\leq 0.05$  on synthesis increase/degradation decrease in at least one perturbation were  
338 included in the diagram, in which genes with p-value  $< 0.1$  on synthesis increase/degradation decrease in  
339 both perturbations were regarded as shared hits between two perturbations. **l.** Heatmaps showing the  
340 steady-state expression, synthesis and degradation rate changes of genes sharing the same regulatory  
341 mechanism upon *DROSHA* and *DICER1* knockdown as shown in j-k. Tiles of each row were colored by  
342 fold changes of values of perturbations relative to NTC. **m.** Line plot showing the *Ago2* binding patterns  
343 on the transcript regions of protein-coding genes in Figure 2n and 2o. The transcript regions of genes were  
344 assembled by merging all exons, and were divided into 5'UTR, coding sequence (CDS), and 3'UTR based  
345 on coordinates of the 5' most start codon and the 3' most stop codon. Single-base coverage of *Ago2* eCLIP  
346 on each gene was calculated, binned, and scaled to 0-1. After merging and averaging scaled binned  
347 coverage of genes in the same group together, the lowest coverage value in the CDS was used to scale the  
348 averaged merged coverage again to visualize the *Ago2*/RISC binding pattern. **n.** Boxplots showing the  
349 relative proportion of labeled mRNA in a chase labeling experiment. HEK293-idCas9-sgNTC,  
350 sgDROSHA, and sgDICER1 cells were labeled with 100uM 4sU for 18 hours, followed by a 10mM  
351 uridine chase for 0h, 2h, and 4h. This tracked the degradation of labeled RNA in genes regulated by  
352 transcription (top) or degradation (bottom) upon *DROSHA* and *DICER1* knockdown (**Methods**). Student  
353 t-tests were performed between knockdown groups and the NTC group. \*\*, p-value  $< 1e-2$ ; \*, p-value  $<$   
354 0.05; NS, no statistical significance.  
355

356 **Endnotes**

357 **Acknowledgments:** We thank all members of the Cao lab for helpful discussions and feedback. We thank  
358 Dr. R. Satija (New York Genome Center) for insightful feedback related to this work. We thank the Tissue  
359 Culture facility of the University of California, Berkeley for the 3T3 cell line, and the Scott Keeney Lab  
360 at Memorial Sloan Kettering Cancer Center for the HEK293 cell line. We thank members of the  
361 Rockefeller University Flow Cytometry Resource Center and the Rockefeller University Genomics  
362 Resource Center for their extensive help with FACS sorting and sequencing experiments. We also thank  
363 members of the Information Technology and High-Performance Computing team at Rockefeller  
364 University, especially J. Banfelder and B. Jayaraman for their great support. We acknowledge that the  
365 research resulting in this publication was supported, in part, by The G. Harold and Leila Y. Mathers  
366 Charitable Foundation.

367  
368 **Funding:** This work was funded by grants from the NIH (1DP2HG012522, 1R01AG076932 and  
369 RM1HG011014) and the Mathers Foundation to J.C..

370  
371 **Author contributions:** J.C. and W.Z. conceptualized and supervised the project. Z.X. performed  
372 experiments, including technique development and optimization, with input from J.L.. Z.X. performed  
373 computational analyses, with input from A.S.. J.C., W.Z., and Z.X. wrote the manuscript with input and  
374 biological insight from all co-authors.

375  
376 **Competing interests statement:** J.C., W.Z., and Z.X. are inventors on pending patent applications related  
377 to *PerturbSci-Kinetics*. Other authors declare no competing interests.

378  
379  
380

381 **Supplementary Figures:**

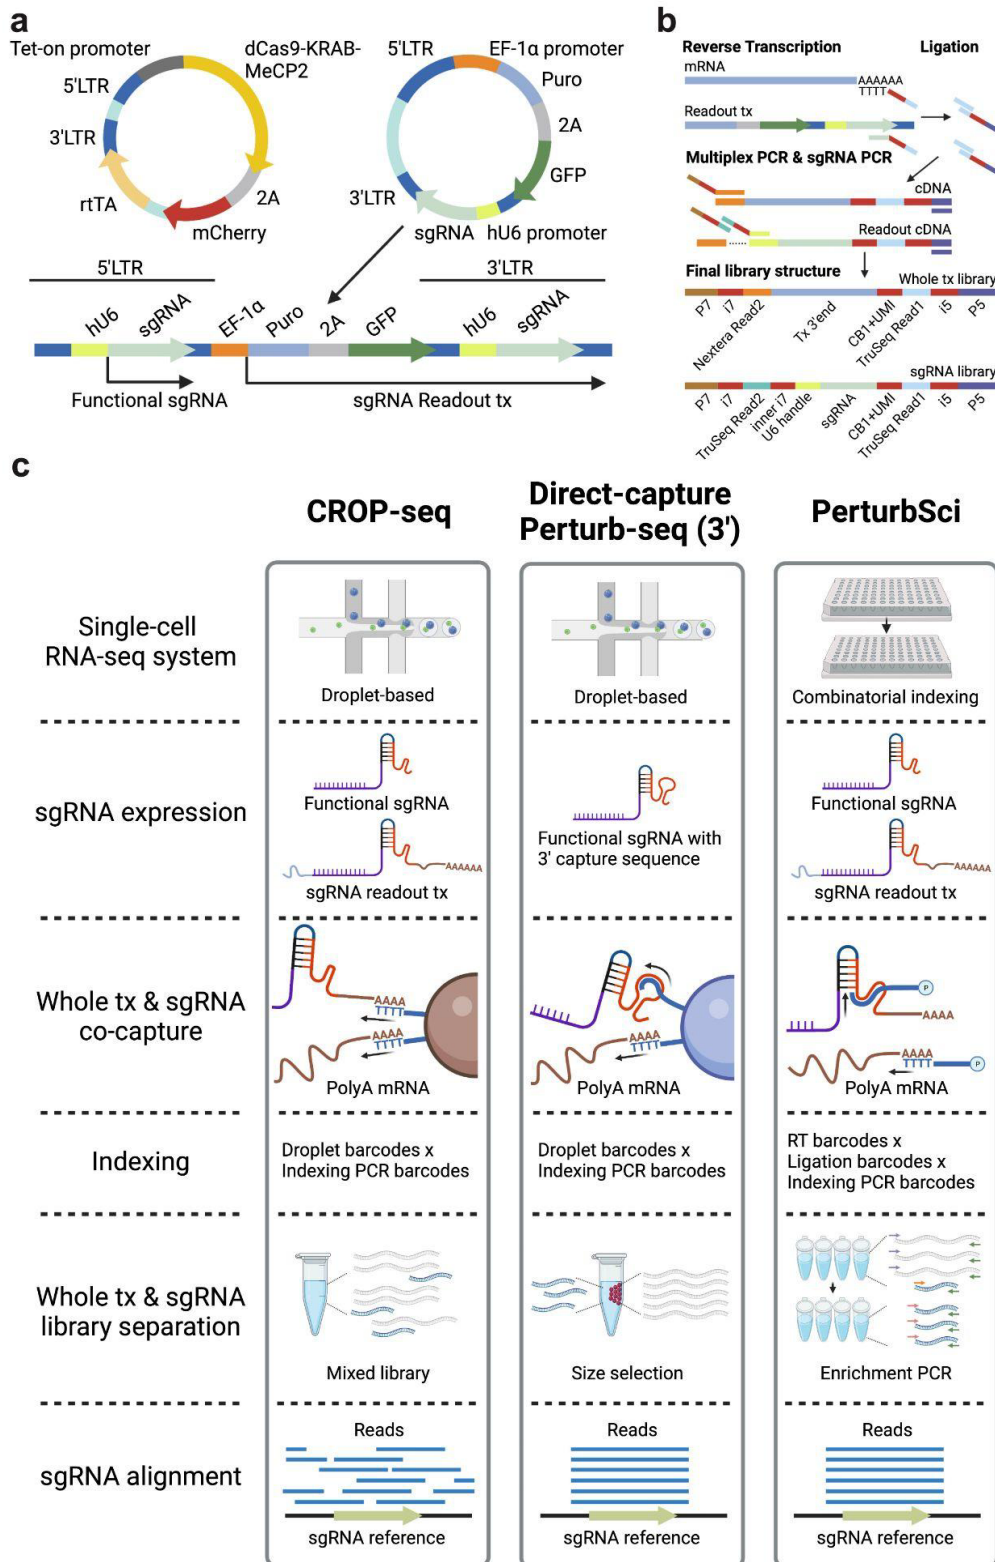

382

383

384

385

**Extended Data Fig. 1. Scheme of plasmids and experiment procedures of *PerturbSci*.** **a.** The vector system used in *PerturbSci* for dCas9 and sgRNA expression. The expression of the enhanced CRISPRi silencer dCas9-KRAB-MeCP2<sup>11</sup> was controlled by the tetracycline responsive (Tet-on) promoter. A GFP

386 sequence was added to the original CROP-seq-opti plasmid<sup>6</sup> as an indicator of successful sgRNA  
387 transduction and for the lentivirus titer measurement. The CROP-seq vector utilizes the self-replication  
388 mechanism of lentivirus during the integration for amplifying the sgRNA expression cassette. In this  
389 lentiviral plasmid, the sgRNA expression cassette replaced the U3 region of the 3'LTR<sup>5</sup>. During the  
390 lentiviral integration, the shortened 5'LTR of reverse-transcribed lentiviral genomic DNA was extended  
391 by using its 3'LTR as a template, and the sgRNA expression cassette is self-replicated to the 5'LTR<sup>54</sup>.  
392 The self-replicated sgRNA expression cassette at 5'LTR generates functional sgRNA for guiding dCas9,  
393 and the original expression cassette at 3'LTR is transcribed as a part of the Puro-GFP fusion transcript  
394 driven by the EF-1 $\alpha$  promoter. **b.** The library preparation scheme and the final library structures of  
395 *PerturbSci*, including a scalable combinatorial indexing strategy with direct sgRNA capture and  
396 enrichment that reduced the library preparation cost, enhanced the sensitivity of the sgRNA capture  
397 compared to the original CROP-seq<sup>5</sup>, and avoided the extensive barcodes swapping detected in *Perturb-*  
398 *seq*<sup>6</sup>. **c.** A schematic comparison of chemistries between *PerturbSci*, CROP-seq<sup>5</sup>, and Direct-capture  
399 *Perturb-seq*<sup>7</sup>.





411 potential Tn5 tagmentation sites. As shown in c, sgRNA primer 2 and 3 yielded strongest amplification  
412 signals following PCR, while primer1 and 4 recovered weak signals. In addition, tagmentation removed  
413 large by-products generated potentially from polyT priming (as shown in b). **d.** We tested different  
414 conditions in post-multiplex PCR purification to obtain the input for the sgRNA enrichment PCR that  
415 could maximize the recovery of the sgRNA library. Left lane: 0.7x-1.5x double-size AMPURE beads  
416 purification followed by the sgRNA enrichment PCR reaction. Middle lane: 0.8x-1.2x AMPURE beads  
417 purification followed by the sgRNA enrichment PCR reaction. Right lane: Gel extraction on multiplex  
418 PCR product within 175-275 bp range followed by the sgRNA enrichment PCR reaction. The recovered  
419 sgRNA libraries generated from gRNA primer2 and 3 were marked on the gel image. Based on the result,  
420 the sgRNA primer2 and the 0.8-1.2x AMPURE beads purification condition yielded the best performance.  
421 **e.** A representative gel image of the final libraries of *PerturbSci*, including the sgRNA library (Lane 1)  
422 and the whole transcriptome library (Lane 2). **f-i.** We tested different concentrations of sgRNA RT primers  
423 in the *PerturbSci* experiment using 3T3-L1-CRISPRi cells transduced with either sgFto and sgNTC. The  
424 box plots show the number of unique sgRNA transcripts (f) or mRNA transcripts (g) detected per cell, the  
425 cell recovery rate (h) and sgRNA capture purity (i) across different sgRNA RT primer concentrations. **j.**  
426 We performed *PerturbSci* experiment with 3T3-L1-CRISPRi cells transduced with sgFto and sgNTC.  
427 After multiplex PCR, PCR product was purified and amplified for sgRNA library enrichment in individual  
428 PCR wells or in a pooled manner. The box plot showing the number of unique sgRNA transcripts detected  
429 per cell across the two conditions. **k.** Scatter plot showing the correlation between log<sub>2</sub>-transformed  
430 counts per million (CPM) profiled by *PerturbSci* and *EasySci*<sup>10</sup> in the mouse 3T3-L1-CRISPRi cell line.  
431 **l.** Barplots showing strong gene expression knockdown in both mouse 3T3-CRISPRi-sgFto cells and  
432 human HEK293-idCas9-sgIGF1R cells that we computationally assigned in the species-mixing  
433 experiment (**Fig 1d**), indicating the accuracy of single-cell sgRNA assignment and the compatibility of  
434 *PerturbSci* with diverse dCas9 effectors.

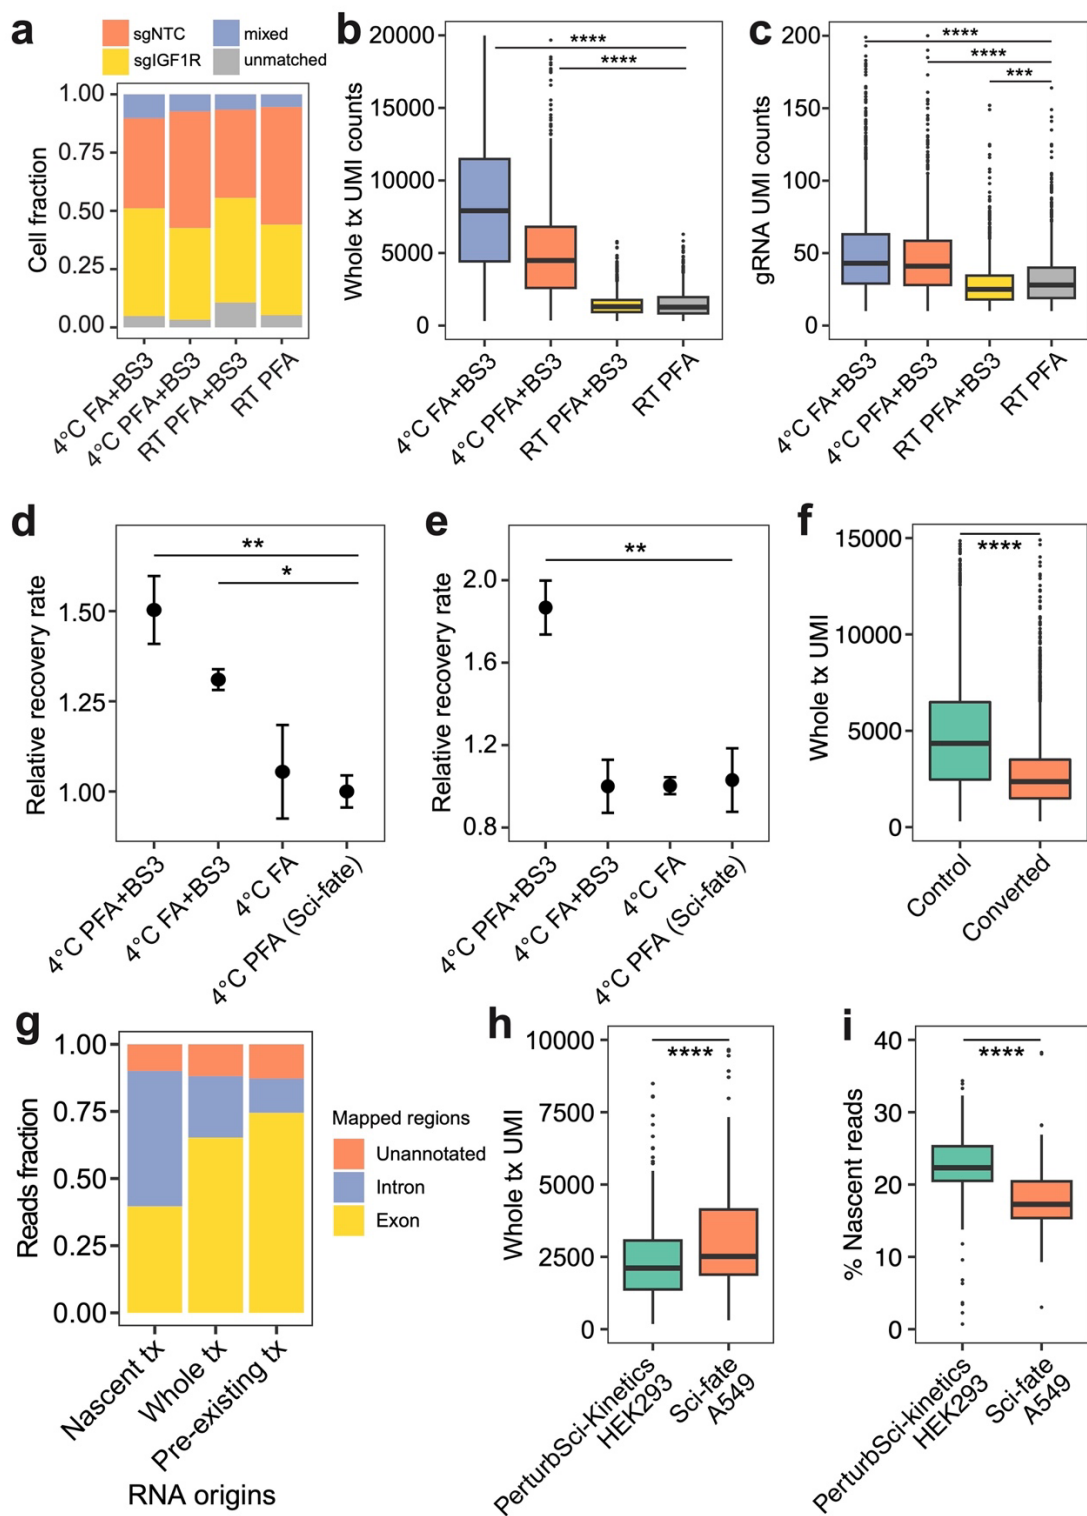

435

436 **Extended Data Fig. 3. Representative optimizations on fixation conditions of *PerturbSci-Kinetics***  
 437 **and statistical benchmarking.** We aimed to search for an optimal fixation condition that can i) minimize  
 438 the cell loss during the fixation and chemical conversion, ii) reduce the RNA cross-contamination, iii) be  
 439 compatible with *in-situ* combinatorial indexing of cellular transcriptomes. **a-c.** We tested different cell  
 440 fixation conditions on HEK293-idCas9 cells followed by *PerturbSci* profiling and quantified the fraction  
 441 of cells that were assigned to different groups (a), the number of unique sgRNA (b) and mRNAs (c)  
 442 detected per cell. PFA fixation conditions at the room temperature (RT) were too strong to recover

443 sufficient signals. FA fixation at 4°C yielded higher total UMI counts but showed stronger cross-  
444 contamination, indicating that under 4°C it was a milder fixative compared to 4% PFA. **d-e.** Dot plots  
445 showing the relative recovery rate (with standard error of the mean) of HEK293-idCas9 cells in different  
446 fixation conditions (n = 4) following HCl permeabilization (d) and chemical conversion (e). All values  
447 were normalized by the standard condition used in sci-fate (PFA fixation)<sup>19</sup>. **f.** Box plot showing the  
448 number of unique transcripts detected per cell with or without chemical conversion. Fixation conditions  
449 included in the plots: 4°C PFA+BS3: cells were fixed with 4% PFA in PBS for 15 minutes, and were  
450 further fixed by 2mM BS3 during and after Triton-X100 permeabilization (**Methods**). 4°C FA+BS3: cells  
451 were fixed with 1% Formaldehyde (FA) in PBS for 10 minutes, and were further fixed by 2mM BS3  
452 during and after Triton-X100 permeabilization. 4°C FA: cells were only fixed once with 1%  
453 Formaldehyde (FA) in PBS for 10 minutes. 4°C PFA: cells were only fixed once with 4% PFA in PBS for  
454 15 minutes as sci-fate<sup>19</sup>. **g.** Mapping statistics of reads of different origins from *PerturbSci-Kinetics*. Exon,  
455 reads were mapped to exonic regions of the genome. Intron, reads were mapped to intronic regions of the  
456 genome. Unannotated, reads were mapped to the genomic regions without annotation. For nascent RNA,  
457 we found an average of 40% reads mapped to exonic regions and 50% reads mapping to intronic regions.  
458 Around 0.9% of nascent reads were mapped to the antisense transcripts. We observed around 10% of the  
459 nascent reads that did not overlap with any annotations in a strand-specific manner, suggesting that they  
460 may represent unannotated transcripts from intergenic regions or antisense transcripts. Notably, the  
461 proportion of unannotated reads we observed is consistent with other sci-RNA-seq datasets<sup>19,57</sup>, indicating  
462 that it is unlikely to be a technique-specific artifact. **h-i.** Downsampling comparison between sci-fate and  
463 *PerturbSci-Kinetics*. A subset of raw reads in sci-fate A549 dataset<sup>19</sup> were randomly selected to generate  
464 a downsampled dataset with the same single-cell raw reads number distribution with *PerturbSci-Kinetics*,  
465 and both datasets were processed using the same pipeline. The single-cell whole transcriptome UMI  
466 counts (h) and the nascent reads percentages (i) between two datasets were compared. One-way ANOVA  
467 on all groups followed by Dunnett's tests between control and other groups were performed in b-e. Wilcox  
468 tests were performed in f, h-i. \*\*\*\*, p-value < 1e-4; \*\*\*, p-value < 1e-3; \*\*, p-value < 1e-2; \*, p-value <  
469 0.05. Comparisons with no statistical significance were not marked.

470

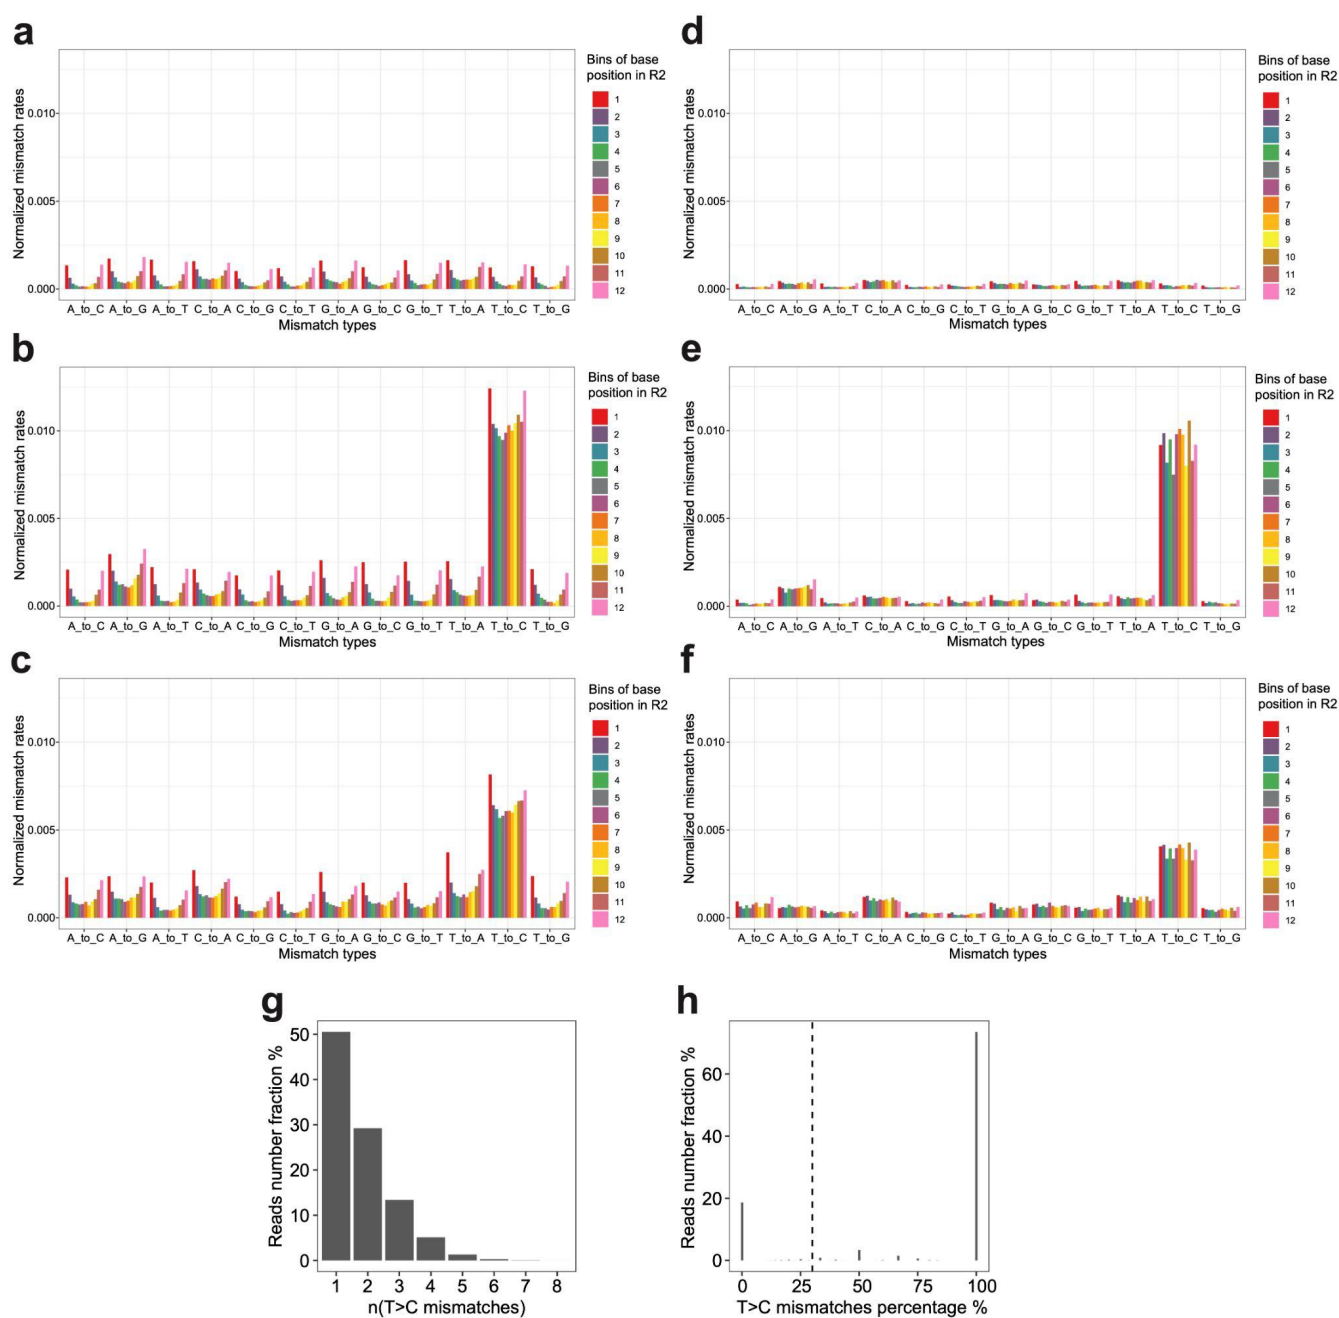

471

472 **Extended Data Fig. 4. Optimization of the computational pipeline for nascent reads calling.** a-c. Bar  
 473 plots showing the normalized mismatch rates of all 12 mismatch types detected in unconverted cells (a),  
 474 converted cells (b), and the original sci-fate A549 dataset<sup>19</sup> (c) at different positions of the reads using the  
 475 original sci-fate mutation calling pipeline<sup>19</sup>. d-f. Bar plots showing the normalized mismatch rates of all  
 476 12 mismatch types detected in unconverted cells (d), converted cells (e), and the original sci-fate A549  
 477 dataset<sup>19</sup> (f) at different positions of the reads using the updated mutation calling pipeline. Considering  
 478 the different sequencing lengths between the present dataset and sci-fate, the Read2 from sci-fate were  
 479 trimmed to the same length as the present dataset before processing. Compared to the original pipeline,  
 480 the updated pipeline further filtered the mismatch based on the CIGAR string and only mismatches with  
 481 “CIGAR = M” were kept. As shown in the result, this optimized pipeline efficiently removed the unaligned

482 mismatches enriched at the 5' and 3' end of reads. Normalized mismatch rates in each bin, the percentage  
483 of each type of mismatch in all sequencing bases within the bin. **g-h.** Statistics of T>C mutations in  
484 *PerturbSci-Kinetics* reads. Histogram showing the number of T>C mutations on reads that are identified  
485 to be from newly synthesized transcripts (g). For each read with high-quality mismatches identified, the  
486 fraction of mismatches from T>C mutations was calculated, which clearly separated the reads with  
487 background mutations and mutants introduced by 4sU in the plot (h). 30% was set as the cutoff to assign  
488 nascent reads as sci-fate<sup>19</sup>.

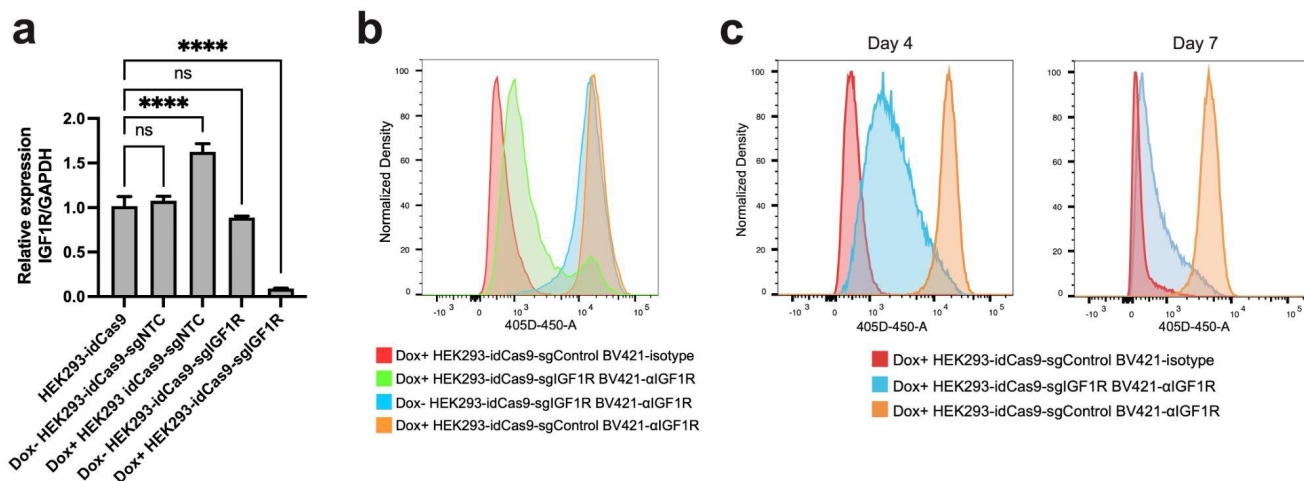

489

490 **Extended Data Fig. 5. Validation of the CRISPRi performance.** Inducible *IGF-1R* mRNA and protein  
 491 knockdown in HEK293-idCas9-sgIGF1R cells were further validated by **a**. RT-qPCR after 3-day Dox  
 492 induction (n=4, Dunnett's test after one-way ANOVA was performed. \*\*\*\*, p-value < 1e-4; ns, no  
 493 statistical significance.) and **b**. flow cytometry after 7-day Dox induction. Isotype, isotype control. αIGF1R,  
 494 anti-IGF1R. **c**. Flow cytometry detection of IGF1R protein abundance after 4/7-day Dox induction in  
 495 sgIGF1R and sgControl cells.

496

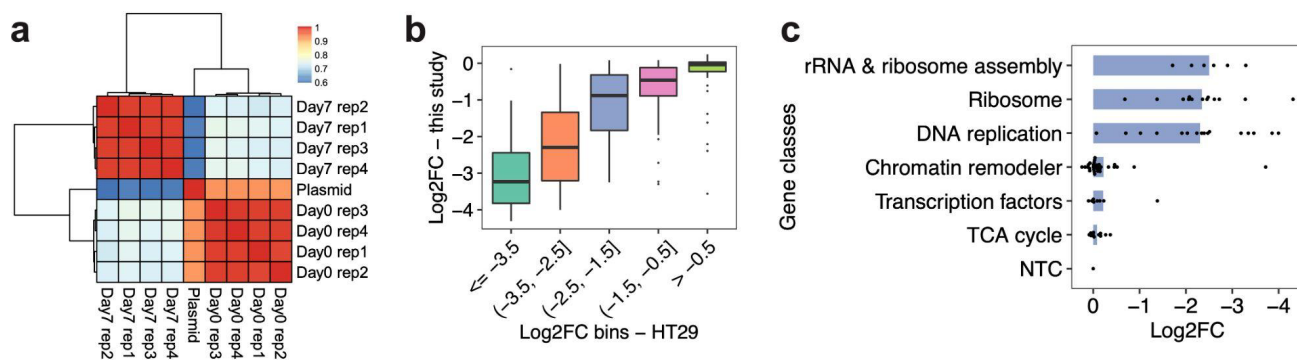

497

498 **Extended Data Fig. 6. The changes in sgRNA abundance are consistent between replicates and**  
 499 **previously published data. a.** Heatmap showing the overall Pearson correlations of normalized sgRNA  
 500 read counts between the plasmid library and bulk screen replicates at different sampling times. For each  
 501 library, read counts of sgRNAs were normalized first by the sum of total counts and then by the counts of  
 502 sgNTC. **b.** Box plot showing the reproducible trends of deletion upon CRISPRi between the present study  
 503 and a prior report<sup>29</sup>. We calculated the fraction changes (After vs. before the CRISPRi induction) of  
 504 sgRNAs for each gene, followed by log2 transformation. **c.** Bar plot showing the different extent of  
 505 deletion of cells receiving sgRNAs targeting genes in different categories in the bulk screen. The  
 506 knockdown on genes with higher essentiality caused stronger cell growth arrest.

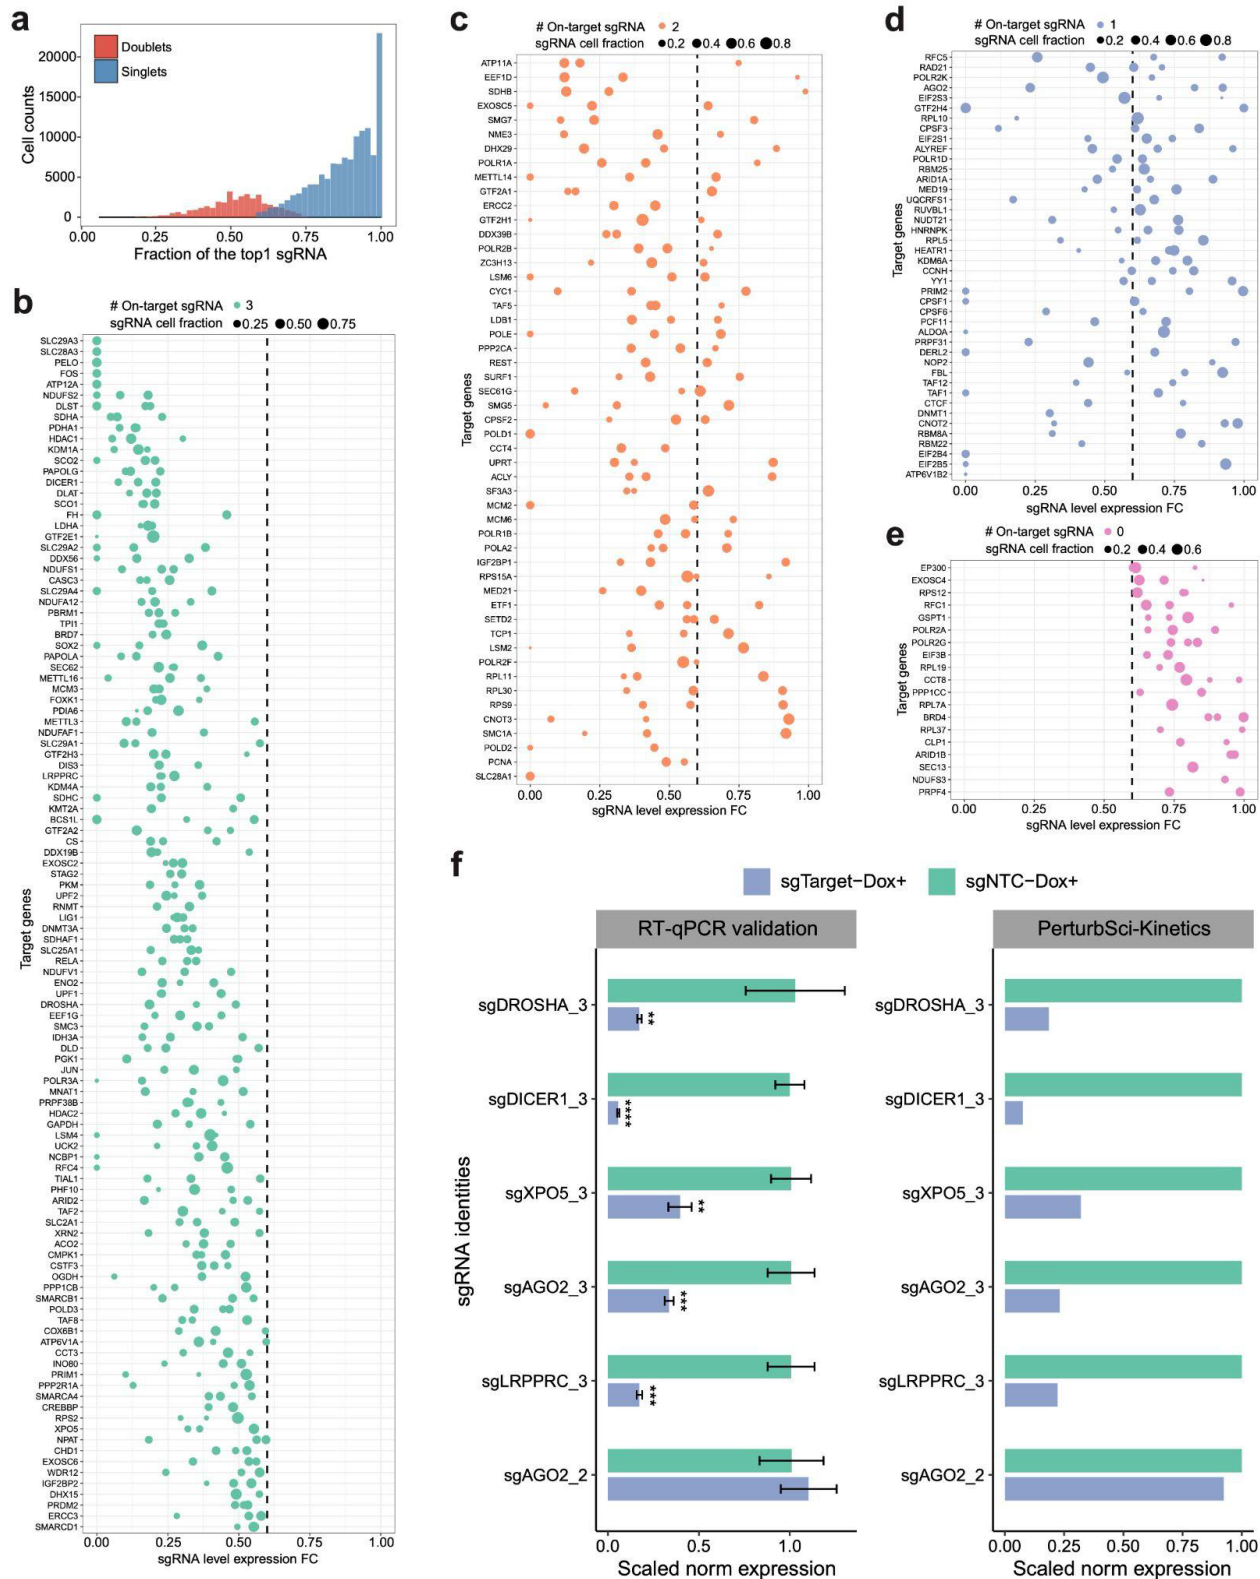

507

508 **Extended Data Fig. 7. Quality control and sgRNA filtering on the *PerturbSci-Kinetics* library.** a. We  
509 filtered out cells assigned to multiple gRNAs based on two criteria: the cell is defined as a sgRNA singlet  
510 if the most abundant sgRNA in the cell took  $\geq 60\%$  of total sgRNA counts and was at least 3-fold of the  
511 second most abundant sgRNA. The histogram shows the fraction distribution of the most abundant sgRNA  
512 in singlets (78%) and doublet cells (22%). b-e. Dotplots showing the expression fold changes of target



513 genes upon CRISPRi induction compared to NTC. Each dot represents a sgRNA. Fold change  $< 0.6$  was  
514 used for sgRNA filtering, and target genes with 3, 2, 1, 0 on-target sgRNA(s) were shown in b-e,  
515 respectively. FC, fold change. **f.** The accuracy of sgRNA targeting efficiency detected in *PerturbSci-*  
516 *Kinetics* was further confirmed by individual RT-qPCR validation (n=4). 5 sgRNAs with high efficiency  
517 and 1 off-target sgRNA were cloned to the modified CROP-seq-opti plasmid, and individual HEK293-  
518 idCas9 clones were established. RNA was extracted and RT-qPCR was conducted after 3-day Dox  
519 induction. ACTB was used as the internal reference in RT-qPCR. \*\*\*\*, p-value  $< 1e-4$ ; \*\*\*, p-value  $<$   
520  $1e-3$ ; \*\*, p-value  $< 1e-2$ . The comparison with no statistical significance was not marked. Mean  
521 expressions of target genes in NTC and corresponding cell populations in the original *PerturbSci-Kinetics*  
522 screen dataset were exhibited on the right for comparison.

523

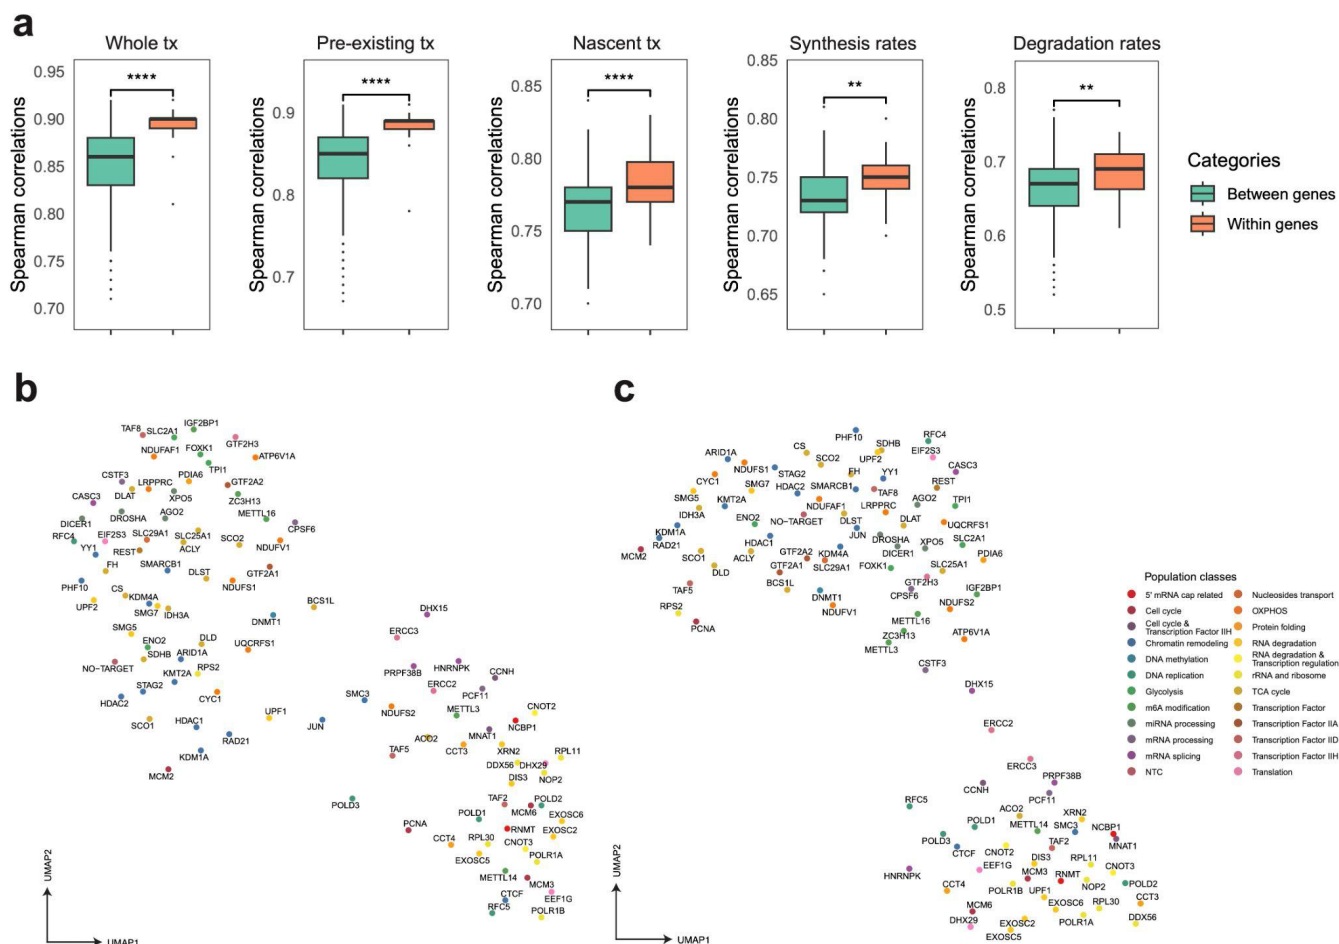

524

525 **Extended Data Fig. 8. PerturbSci-Kinetics captures multi-layer transcriptome and RNA kinetics**  
 526 **information upon perturbations. a.** Boxplots showing the pairwise correlation coefficients of sgRNAs  
 527 targeting the same gene or different genes, computed using aggregated whole transcriptomes, pre-existing  
 528 transcriptomes, nascent transcriptomes, gene-specific synthesis rates and degradation rates. Considering  
 529 the data sparsity and different cell numbers across perturbations, 150 cells per sgRNA were assembled  
 530 into one pseudobulk for downstream analysis. Spearman correlation coefficients were calculated using  
 531 DEGs between perturbations and NTC in the pooled screen. Compared with sgRNAs targeting different  
 532 genes, the sgRNAs targeting the same genes showed significantly higher correlations in the aggregated  
 533 whole RNA, preexist RNA, nascent RNA, synthesis rates, and degradation rates, confirming the data  
 534 quality of our pooled perturbation. **b-c.** UMAP visualization of gene perturbations by inferred synthesis  
 535 rates (b) or degradation rates (c). Differentially expressed genes between all perturbations-NTC pairs were  
 536 combined, and their synthesis and degradation rates were calculated for each perturbation. For genes with  
 537 no steady-state expression or no nascent counts, their synthesis and degradation rates were both assigned  
 538 as 0. To denoise, only genes with inferred synthesis or degradation rate > 0 in at least 75% of pseudobulk  
 539 cell populations were used for dimension reduction. The top 12 and 15 principal components from the  
 540 synthesis and degradation rates matrix were used for UMAP visualization, respectively. These UMAPs  
 541 still showed meaningful patterns. For example, RNA exosome genes (*e.g.*, EXOSC2, EXOSC5, EXOSC6),  
 542 nonsense-mediated mRNA decay pathway members (*e.g.*, SMG5, SMG7), ribosomal biogenesis genes  
 543 (*e.g.*, NOP2, RPL30, RPL11, POLR1A, POLR1B), miRNA biogenesis pathway members (*e.g.*, DICER1,  
 544 DROSHA, XPO5, and AGO2) were in relative proximity in both UMAPs. Chromatin remodelers (*e.g.*,

545 HDAC1, HDAC2, STAG2, RAD21, KMT2A, KDM1A, ARID1A) were closely clustered in synthesis  
546 rates-derived UMAP, while m6A regulators (*e.g.*, METTL3, METTL16, ZC3H13, IGF2BP1) and  
547 polyadenylation factors (*e.g.*, CPSF6, CSTF3) were closer to each other in degradation rates-derived  
548 UMAP.

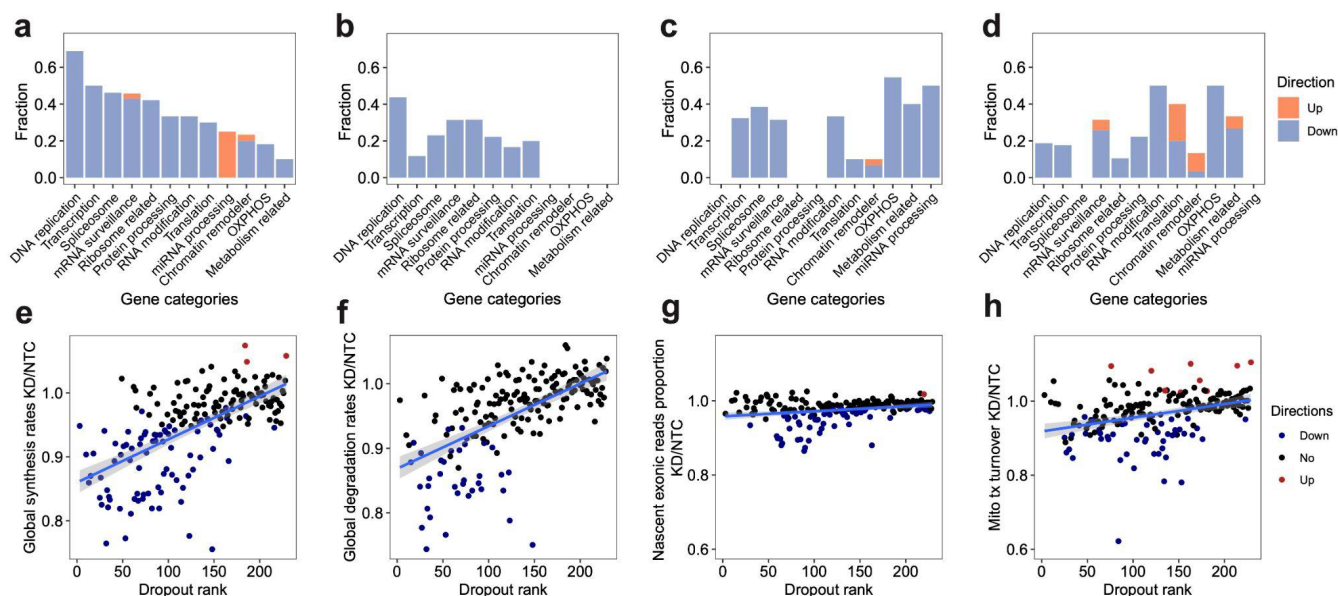

549

550 **Extended Data Fig. 9. A systematic view of the effects of perturbations on global synthesis rates,**  
 551 **global degradation rates, exonic reads ratio, and mitochondrial turnover rates. a-d.** For each gene  
 552 category, we calculated the fraction of genetic perturbations associated with significant changes in global  
 553 synthesis rates (a), global degradation rates (b), proportions of exonic reads in the nascent transcriptome  
 554 (c), and proportions of mitochondrial nascent reads (d). Overall global transcription could be affected by  
 555 more genes than degradation. Perturbation on essential genes, such as DNA replication genes, could affect  
 556 both global synthesis and degradation. Perturbations on chromatin remodelers only specifically impaired  
 557 the global synthesis rates but not the degradation rates, supporting the established theory that gene  
 558 expression is regulated by chromatin folding. In addition to the enrichment of genes in transcription,  
 559 spliceosome and mRNA surveillance, perturbation on OXPPOS genes and metabolism-related genes also  
 560 affected the RNA processing, consistent with the fact that 5' capping, 3' polyadenylation, and RNA  
 561 splicing are highly energy-dependent processes. That knockdown of OXPPOS genes and metabolism-  
 562 related genes could reduce the mitochondrial transcriptome dynamics and also supported the complex  
 563 feedback mechanisms between energy metabolism and mitochondrial transcription<sup>58</sup>. **e-h.** Scatter plots  
 564 showing the relationships between dropout effects and global synthesis rates (e), global degradation rates  
 565 (f), proportions of exonic reads in the nascent transcriptome (g), and mitochondrial RNA turnover (h).  
 566 Dropout rank, the ascending rank of gene-level sgRNA counts log<sub>2</sub>FC from the bulk screen. Directions  
 567 were assigned as shown in Figure 2e-h. Both global synthesis and degradation rates showed strong  
 568 negative correlations with dropout, indicating knocking out essential genes generally resulted in impaired  
 569 global RNA synthesis and degradation. In contrast, proportions of exonic reads in the nascent  
 570 transcriptome were much more stable across perturbations, and were only specifically affected by genes  
 571 functioning in RNA processing. Proportions of mitochondrial nascent reads were also prone to be affected  
 572 by genetic perturbation, but directions of changes depend more on the functions of perturbed genes than  
 573 the essentiality of genes.

574

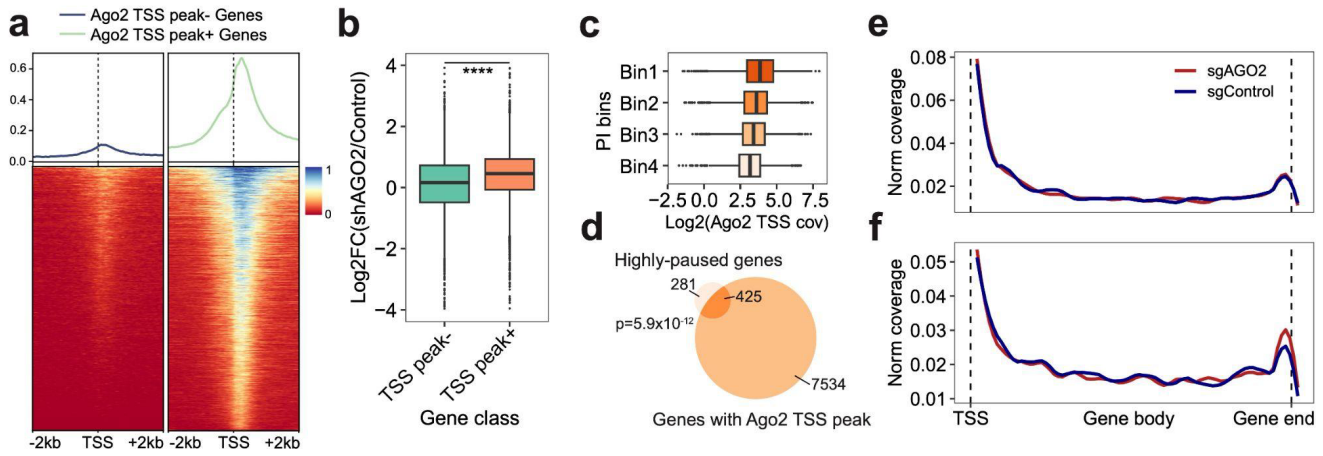

575

576 **Extended Data Fig. 10. AGO2 functions as a transcriptional repressor by arresting transcription at**  
 577 **the pausing status.** **a.** The density plot (top) and heatmap (bottom) show the density of Ago2 ChIP-seq  
 578 reads around TSS of genes with or without enriched Ago2 TSS binding peaks. **b.** We calculated the  
 579 log<sub>2</sub>FC of gene expression between AGO2-silenced and control groups on genes with or without Ago2  
 580 TSS binding peaks. **c.** The box plot displays the positive correlation between PI of genes and normalized  
 581 Ago2 ChIP-seq coverage within corresponding TSS regions. **c-d.** Genes were separated into 4 bins based  
 582 on the average ranks of PI in two replicates (**Methods**). The Venn diagram highlights the significant  
 583 association between Ago2 TSS binding and strong pausing status of genes. Highly-paused genes, genes  
 584 with top 10% of average PI ranks. **e-f.** Highly-paused genes were split into two groups, 1) significantly-  
 585 upregulated genes upon AGO2 knockdown or 2) genes without significant expression changes. We then  
 586 calculated the nascent RNA coverage of these two groups of genes in sgNTC and sgAGO2 cells. Notably,  
 587 only genes in group 1 displayed increased 3' end enrichment upon AGO2 knockdown (f).

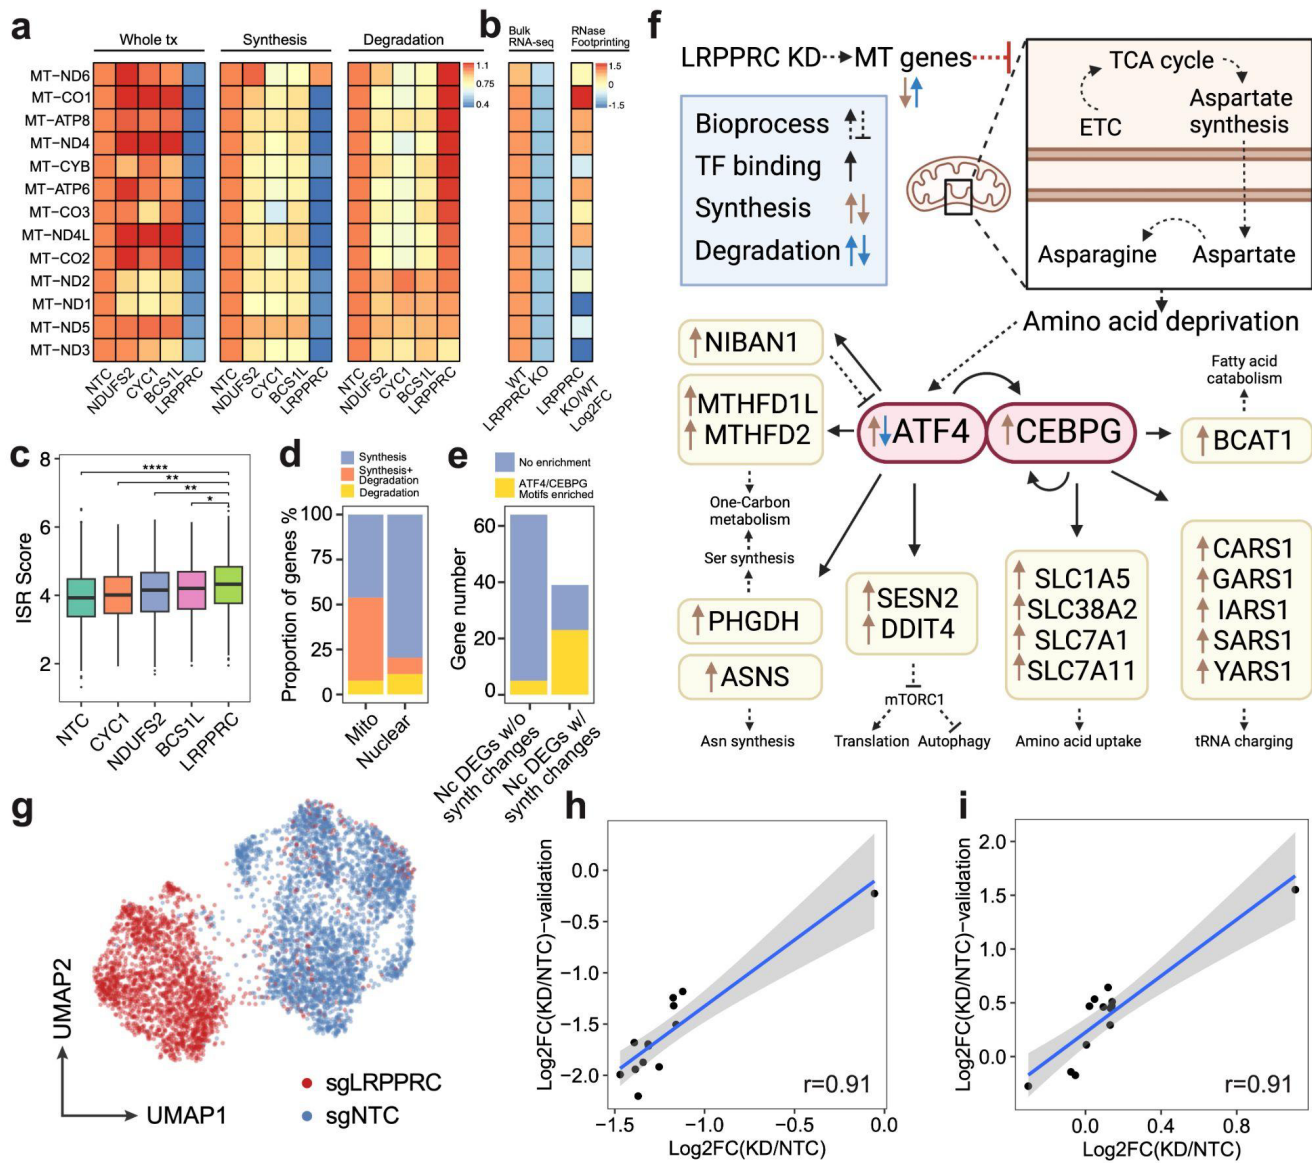

588

589 **Extended Data Fig. 11. *PerturbSci-kinetics* identified LRPPRC as the master regulator of**  
 590 **mitochondrial RNA dynamics.** **a.** Heatmap showing the relative fold changes of gene expression,  
 591 synthesis, and degradation rates of mitochondrial protein-coding genes upon NDUFS2, CYC1, BCS1L  
 592 and LRPPRC knockdown compared to NTC cells. Perturbation on genes encoding electron transport chain  
 593 components resulted in stable steady-state expression with impaired turnover. However, LRPPRC  
 594 knockdown significantly disrupted the mitochondrial transcriptome dynamics by inhibiting the synthesis  
 595 of almost all mitochondrial protein-coding genes and promoting the degradation of multiple genes  
 596 including *MT-ND6*, *MT-CO1*, *MT-ATP8*, *MT-ND4*, *MT-CYB* and *MT-ATP6*. **b.** The heatmap on the left  
 597 showed mean z-scored mitochondrial protein-coding gene expression changes between wild-type and  
 598 *LRPPRC*-knockout mice heart tissue samples, as reported by Siira, S.J., et al.<sup>43</sup>. The heatmap on the right  
 599 showed the extent of the mRNA secondary structure increase upon *Lrpprc* knockdown observed in the  
 600 same prior study<sup>43</sup>, which positively correlated with the elevated degradation rates of genes detected in  
 601 our study (coefficient of Pearson correlation = 0.708, p-value = 6.8e-3). These results further validated  
 602 the mRNA-stabilizing role of *Lrpprc* in regulating mitochondrial transcriptome. **c.** Boxplot showing the  
 603 distribution of integrated stress response scores of single cells received different perturbations. ISR,

604 integrated stress response. ISR score, average normalized expressions of genes within the ISR  
605 transcription program identified by Genome-wide Perturb-seq<sup>8</sup>. \*\*\*\*, p-value < 1e-4; \*\*, p-value < 1e-2;  
606 \*, p-value < 0.05. **d.** Bar plot showing the fraction of genes regulated by synthesis, degradation or both in  
607 mitochondrial-encoded and nuclear-encoded DEGs. **e.** Bar plot showing the enrichment of *ATF4/CEBPG*  
608 motifs at promoter regions of DEGs with or without significant synthesis changes. Nc DEGs w/o synth  
609 changes, Nuclear-encoded differentially expressed genes without synthesis changes. Nc DEGs w/ synth  
610 changes, Nuclear-encoded differentially expressed genes with synthesis changes. A large part of  
611 synthesis-regulated nuclear-encoded DEGs showed motif enrichment, suggesting the activation of an  
612 integrated stress response transcriptional program mediated by *ATF4/CEBPG* upon *LRPPRC*  
613 knockdown<sup>59</sup>. 5kb regions around transcription start sites of input genes were used for motif scanning and  
614 enrichment calculation using RcisTarget<sup>60</sup>. We identified two transcription factors (*ATF4* and *CEBPG*)  
615 that were i) significantly upregulated upon *LRPPRC* knockdown ii) significantly over-represented in the  
616 surroundings of the transcription start site of the synthesis-regulated nuclear-encoded DEGs (Normalized  
617 motif enrichment score of 16 for *ATF4* and 16.6 for *CEBPG*). **f.** The transcriptional regulatory network in  
618 *LRPPRC* perturbation inferred from our analysis. Notably, it was consistent with the prior study<sup>59</sup> that  
619 *ATF4* was regulated at both transcriptional and post-transcriptional levels. **g.** Single-cell UMAP  
620 embedding of HEK293-idCas9-sgNTC and sgLRPPRC cells in the validation dataset. **h-i.** Correlations of  
621 synthesis rate and degradation rate changes of mitochondrial mRNA upon *LRPPRC* knockdown between  
622 the original screen and the validation dataset. *r*, coefficient of Pearson correlation.

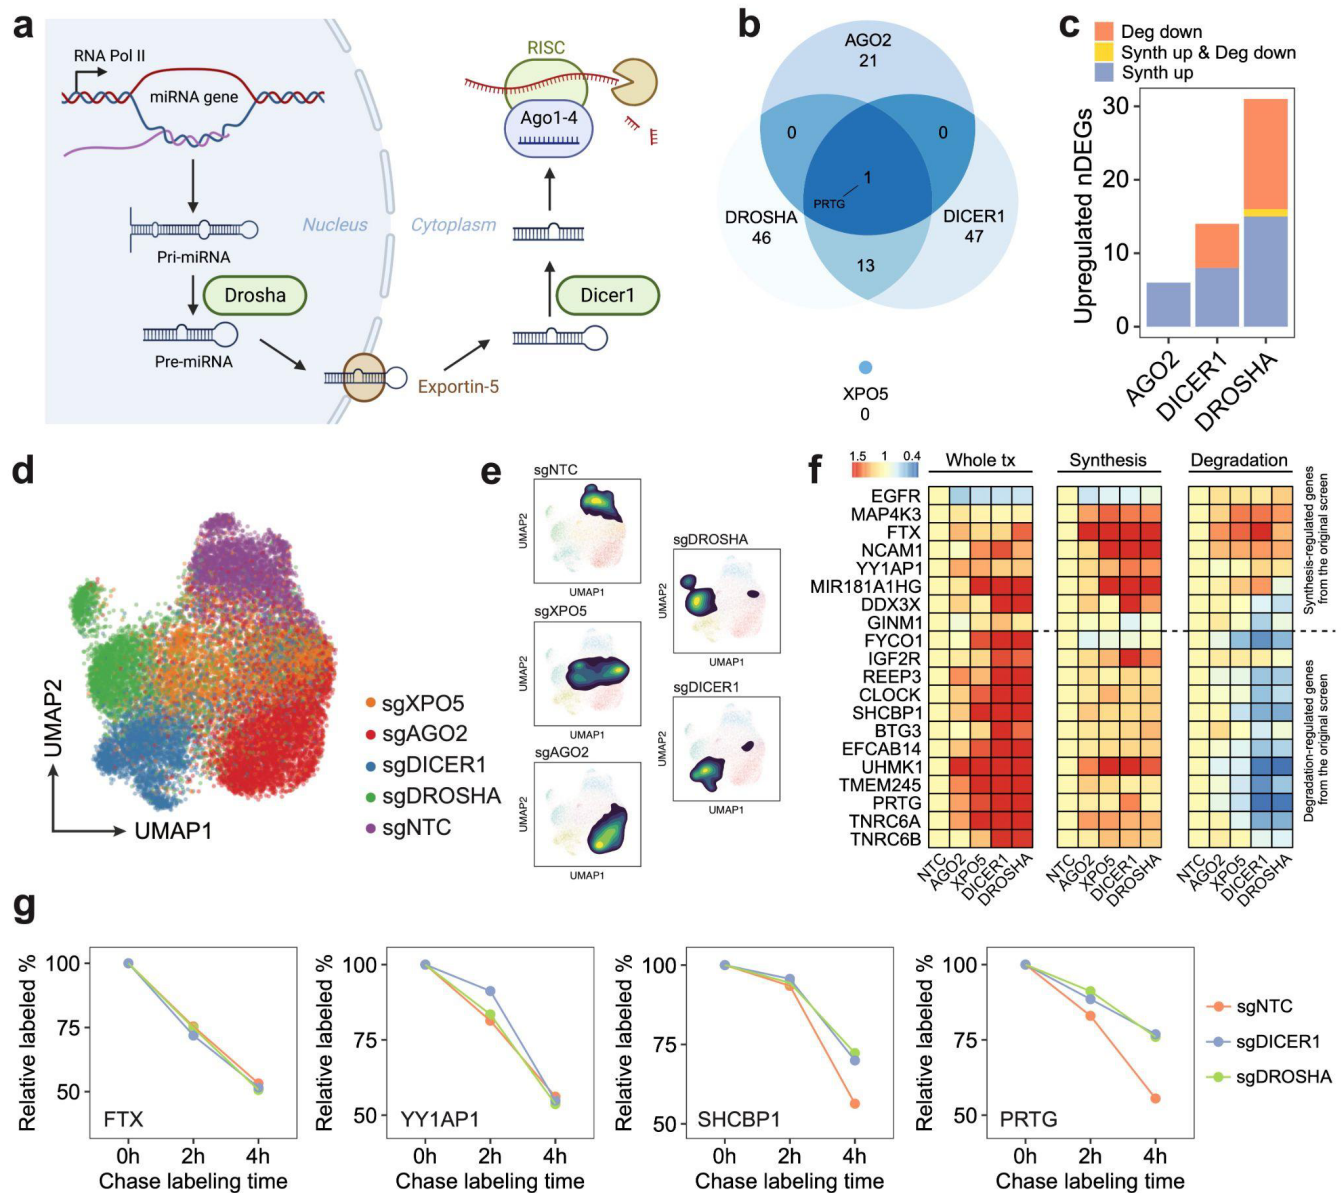

623

624 **Extended Data Fig. 12. The overview of the miRNA biogenesis pathway and the validation on**  
625 **miRNA pathway perturbations.** **a.** Illustration of the canonical miRNA biogenesis pathway. After the  
626 transcription of miRNA host genes, the primary miRNA (pri-miRNA) forms into a hairpin and is  
627 processed by *Drosha*. Processed precursor miRNA (pre-miRNA) is transported to the cytoplasm by  
628 Exportin-5. The stem loop is cleaved by *Dicer1*, and one strand of the double-stranded short RNA is  
629 selected and loaded into the RISC for targeting mRNA<sup>46</sup>. **b.** Venn diagram showing the overlap of  
630 upregulated DEGs across perturbations on four genes encoding main members of the miRNA pathway.  
631 The knockdown of two critical RNases in this pathway (*i.e.*, *DROSHA* and *DICER1*) resulted in  
632 significantly overlapped DEGs ( $p$ -value =  $2.2e-16$ , Fisher's exact test). In contrast, *AGO2* knockdown  
633 resulted in more unique transcriptome features, and only 1 DEG (*PRTG*, identified to be mainly regulated  
634 by degradation and has been reported as a miRNA target<sup>61</sup>) overlapped with DEGs from *DROSHA* and  
635 *DICER1* knockdown, indicating the RNAi-independent roles of *AGO2*. Interestingly, *XPO5* knockdown  
636 showed no upregulated DEGs, which is consistent with a previous report in which *XPO5* silencing only  
637 minimally perturbed the miRNA biogenesis, indicating the existence of an alternative miRNA



638 transportation pathway<sup>47</sup>. **c.** Bar plot showing the fraction of upregulated DEGs driven by synthesis  
639 changes and degradation changes upon *DROSHA*, *DICER1*, and *AGO2* perturbations. While *DROSHA*  
640 and *DICER1* knockdown resulted in increased synthesis and reduced degradation, *AGO2* knockdown only  
641 affected gene expression transcriptionally, which was consistent with the previous finding that *AGO2*  
642 knockdown resulted in a global increase of synthesis rates (**Fig 2e**), and further supported its roles in  
643 nuclear transcription regulation<sup>62-64</sup>. As *Drosha* is upstream of *Dicer1* in the pathway, we indeed observed  
644 stronger effects of *DROSHA* knockdown than *DICER1* knockdown, which was supported by the previous  
645 study<sup>47</sup>. **d-e.** UMAP embedding of NTC cells and single cells with individual miRNA biogenesis pathway  
646 genes knockdown (d). Perturbed cells exhibited distinct transcriptomic features and low-dimensional  
647 space distributions (e). **f.** Steady-state expression, synthesis rate, and degradation rate changes of  
648 synthesis/degradation-regulated genes showed high consistencies between the validation dataset and the  
649 original screen. **g.** Examples showing unchanged (transcription-regulated genes: *FTX*, *YY1AP1*) and  
650 enhanced (degradation-regulated genes: *SHCBP1*, *PRTG*) mRNA stability upon *DROSHA/DICER*  
651 knockdown. After long term 4sU labeling on Dox-induced HEK293-idCas9-sgNTC, sg*DROSHA*,  
652 sg*DICER* cells, chase labeling was performed. 3'end SLAM-seq was used to directly track the degradation  
653 of labeled mRNA. The fraction of labeled read counts of individual genes at each time point were divided  
654 by their labeled fractions at 0h for normalization.

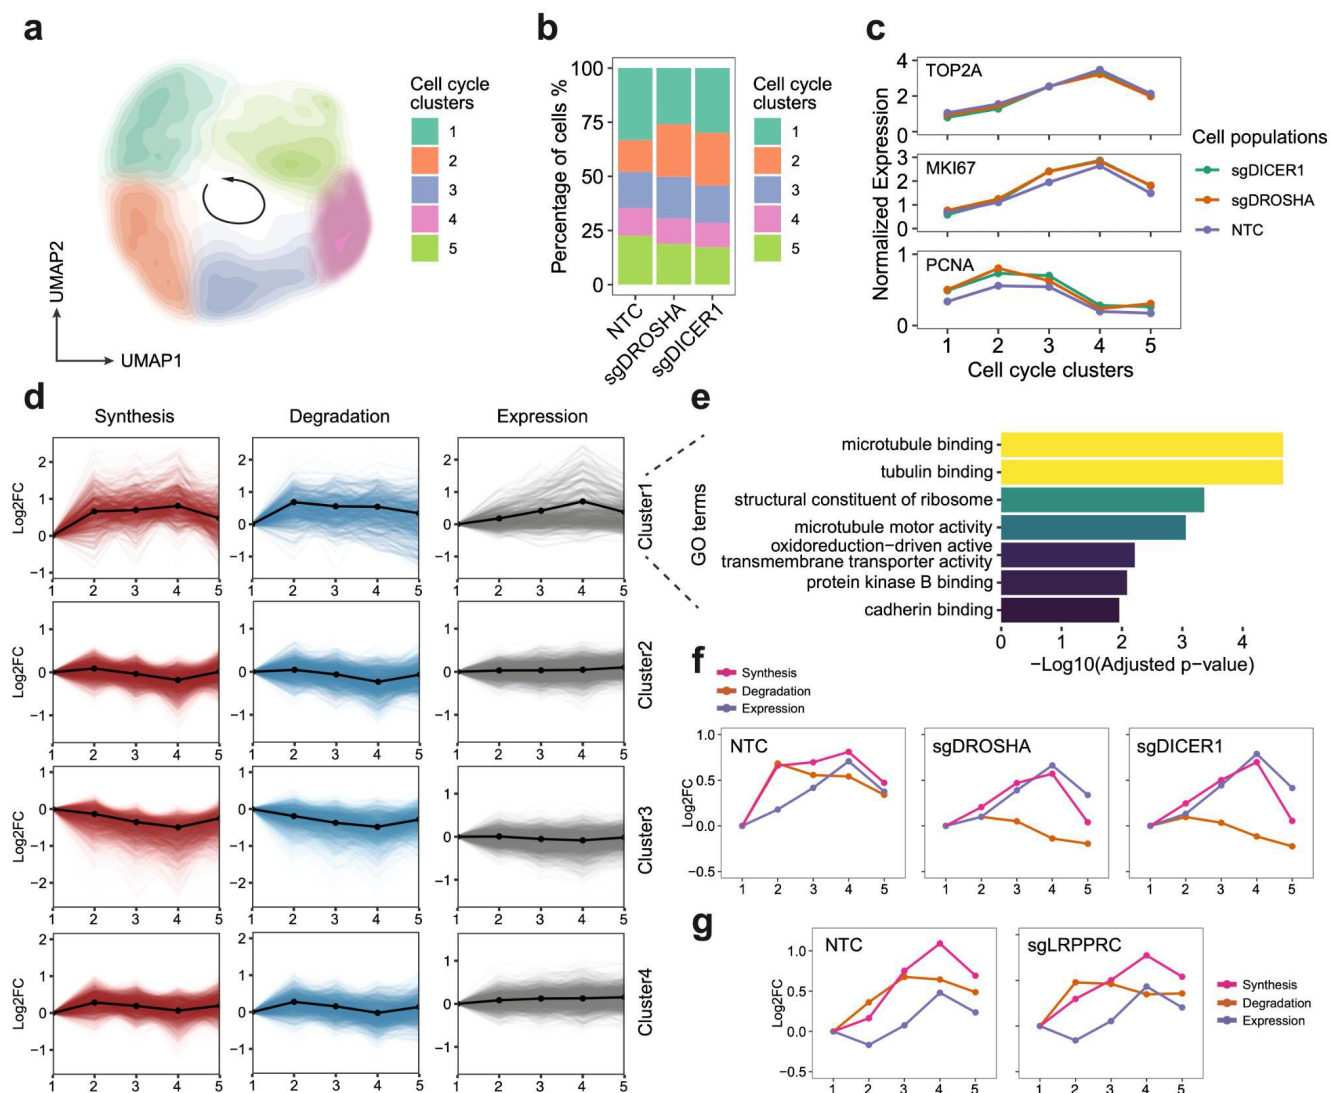

655

656 **Extended Data Fig. 13. *PerturbSci-Kinetics* enables dissecting the effects of perturbations on cell**  
 657 **cycle-dependent RNA dynamics. a.** UMAP embedding of miRNA pathway genes-knockdown cells and  
 658 NTC cells reflected the cell-cycle progression. **b.** Stacked barplot showing the cell cycle distribution of  
 659 cells from each perturbation. **c.** The expression changes of cell cycle marker genes in cell cycle clusters.  
 660 **d.** The cell cycle time-course synthesis rates, degradation rates, and expression levels of 4 gene clusters.  
 661 Solid lines with dots, the mean values and the average trend of all genes within the cluster. **e.** Highly  
 662 enriched GO terms of gene cluster 1 in GO enrichment analysis. **f.** Averaged trends of cell cycle time-  
 663 course synthesis rates, degradation rates, and expression levels of cluster 1 genes in HEK293-idCas9-  
 664 sgNTC, sgDROSHA, sgDICER1 cells. **g.** Averaged trends of cell cycle time-course synthesis rates,  
 665 degradation rates, and expression levels of cluster 1 genes in NTC and sgLRPPRC HEK293-idCas9 cells.  
 666 Considering potential strong batch effects from distinct genetic perturbation, cell cycle clustering analysis  
 667 in (g) was performed independently of (a). Cell cycle clusters in (g) were not fully synchronized with  
 668 clusters in (f).

669

## 670 **Materials and Methods:**

### 671 **Cell culture**

672 The 3T3-L1-CRISPRi cell line was obtained from the Tissue Culture facility at the University of  
673 California, Berkeley. The HEK293 cell line was a gift from the Scott Keeney Lab at Memorial Sloan  
674 Kettering Cancer Center. The HEK293T cell line and the NIH/3T3 cell line were obtained from ATCC.  
675 All cells were maintained at 37 °C and 5% CO<sub>2</sub> in high glucose DMEM medium supplemented with L-  
676 Glutamine and Sodium Pyruvate (Gibco 11995065) and 10% Fetal Bovine Serum (FBS; Sigma F4135).  
677 When generating a monoclonal cell line, the medium was supplemented with 1% Penicillin-Streptomycin  
678 (Gibco 15140163). In the screening experiment, sgRNA-transduced HEK293-idCas9 cells were cultured  
679 in high glucose DMEM medium supplemented with L-Glutamine (Gibco 11965092) and 10% FBS,  
680 following the induction of dCas9-KRAB-MeCP2 expression by 1ug/ml Dox (Sigma D5207),

681

### 682 **Cell lines generation**

683 To generate HEK293 with Dox-inducible dCas9-KRAB-MeCP2 expression, the lentiviral plasmid Lenti-  
684 idCas9-KRAB-MeCP2-T2A-mCherry-Neo was constructed. A dCas9-KRAB-MeCP2-T2A insert was  
685 amplified from dCas9-KRAB-MeCP2 (Addgene #110821). A T2A-mCherry Gblock was synthesized by  
686 IDT. Gibson Assembly reaction (NEB E2611S) was performed at 50 °C with a mixture of Bsp119I-  
687 digested Lenti-Neo-iCas9 (Thermo FD0124; Addgene #85400), dCas9-KRAB-MeCP2-T2A amplicon,  
688 T2A-mCherry Gblock for 60 minutes to construct a dCas9-KRAB-MeCP2-T2A-mCherry plasmid. The  
689 reaction product was transformed into NEBstable competent cells (NEB C3040H), and colonies were  
690 inoculated and amplified in LB medium (Gibco 10855001) with 50ug/ml Sodium Ampicillin (Sigma  
691 A8351) at 37 °C overnight.

692

693 After plasmid extraction (QIAGEN No.27106) and sequencing validation, the plasmid was co-transfected  
694 with psPAX2 (Addgene #12260) and pMD2.G (Addgene #12259) into low-passage HEK293T cells in a  
695 10cm dish using Polyjet (SignaGen SL100688) for 24 hours. Cells were gently washed twice with PBS,  
696 then cultured in a medium with 10mM Sodium Butyrate (Sigma TR-1008-G) for another 24 hours. The  
697 supernatant was collected, and cell debris was cleared by spinning down (5 minutes, 1000xg) and passed  
698 through a 0.45 µm filter. The lentivirus was concentrated 10x by the Lenti-X concentrator (TaKaRa  
699 631231), and the virus suspension was flash frozen by Liquid Nitrogen and was stored at -80 °C.

700

701 The lentivirus titer was determined by examining the ratio of mCherry+ cells after 24 hours of transduction  
702 and 48 hours of Dox induction. Polybrene (Sigma TR-1003) at a final concentration of 8ug/ml was used  
703 to enhance the transduction efficiency. Then HEK293 cells were counted and transduced with lentivirus  
704 at MOI = 0.2 for 48 hours. Cells were treated with Dox for 48 hours, and the top 10% of cells with the  
705 strongest mCherry fluorescence were sorted to each well of a 96-well plate containing 100ul medium.  
706 After a 3-week expansion, monoclonal cells that survived were transferred to larger dishes for further  
707 expansion. We picked the clone with inducible homogeneous strong mCherry expression and normal  
708 morphology for the following experiment.

709

710 The polyclone 3T3-CRISPRi cell line was generated in a similar way. pHR-SFFV-dCas9-BFP-KRAB  
711 (Addgenes #46911) was co-transfected with psPAX2 and pMD2.G to generate dCas9-expressing  
712 lentivirus, and the transduction at MOI=0.2 was performed on 3T3 cells. BFP<sup>hi</sup> cells (top 35% in BFP+

713 population) were sorted and the sorting was repeated twice more after cell expansion to enrich cells with  
714 strong dCas9 expression.

715

### 716 **Gene Knockdown and efficacy examination**

717 To simplify the lentiviral titer measurement, CROP-seq-opti-Puro-T2A-GFP was assembled by adding a  
718 T2A-GFP downstream of Puromycin resistant protein coding sequence on the CROP-seq-opti plasmid  
719 (Addgene #106280). Flanking MluI and CsiI digestion sites were added to the GFP Gblock (IDT) by PCR.  
720 Both amplicon and CROP-seq-opti vector were digested using MluI (Thermo, FD0564) and CsiI (Thermo,  
721 FD2114) at 37 °C for 30 minutes, and were ligated at room temperature for 20 minutes using the Blunt/TA  
722 Ligase Master Mix (NEB M0367S). Transformation, clone amplification, and sequencing validation were  
723 done as stated above.

724

725 Oligos corresponding to individual guides for ligation were ordered as standard DNA oligos from IDT  
726 with the following design:

727

728 Plus strand: 5'-CACCG[20bp sgRNA plus strand sequence]-3'

729 Minus strand: 5'-AAAC[20bp sgRNA minus strand sequence]C-3'

730

731 Oligos were reconstituted into 100uM and were mixed and phosphorylated using T4 PNK (NEB M0201S)  
732 by incubating at 37 °C for 30 minutes. The reaction was heated at 95 °C for 5 minutes and then ramped  
733 down to 25 °C by -0.1 °C/second to anneal oligos into a double-stranded duplex. The CROP-seq-opti-  
734 Puro-T2A-GFP was digested by Esp3I (NEB R0734L) at 37 °C for 30 minutes, then the linearized  
735 backbone and the annealed duplex were ligated at room temperature for 20 minutes using the Blunt/TA  
736 Ligase Master Mix (NEB M0367S). Transformation, clone amplification, sequencing validation,  
737 lentivirus generation, and titer measurement were done as stated above.

738

739 Mouse 3T3-L1-CRISPRi cells and 3T3-CRISPRi cells were transduced with the lentivirus expressing  
740 non-target control (NTC) sgRNA or sgRNA targeting *Fto*. Human HEK293-idCas9 cells were transduced  
741 with lentivirus expressing NTC sgRNA or sgRNA targeting *IGF1R* during technique development, and  
742 HEK293-idCas9-sgXPO5, sgAGO2, sgDROSHA, sgDICER1, sgLRPPRC cell lines were later  
743 established for validating significant hits from the screen. Transduction was carried out at MOI = 0.2 with  
744 8ug/ml of Polybrene for 48 hours. Based on our puromycin titration experiments, sgRNA-transduced 3T3-  
745 L1-CRISPRi cells were selected by 2.5ug/ml Puromycin for 2 days and 2ug/ml Puromycin for 3 days, and  
746 sgRNA-transduced HEK293-idCas9 cells were selected by 1.5ug/ml Puromycin for 3 days and 1ug/ml  
747 Puromycin for 2 days. sgRNA-transduced 3T3-CRISPRi cells were directly sorted by gating on GFP  
748 fluorescence.

749

750 As dCas9-BFP-KRAB was constitutively expressed in 3T3-L1-CRISPRi cells and 3T3-CRISPRi cells,  
751 target genes started being silenced once sgRNA lentivirus was introduced. For HEK293-idCas9 cells, Dox  
752 treatment for a minimum of 72 hours was required before examining the knockdown effect.

753

754 For RT-qPCR validation, primer pairs targeting IGF1R, AGO2, XPO5, DROSHA, DICER1, LRPPRC,  
755 ACTB were selected from PrimerBank (<https://pga.mgh.harvard.edu/primerbank/>) and were synthesized

756 from IDT. Total RNA in 1e6 cells of each sample was extracted using the RNeasy Mini kit (QIAGEN  
757 74104) and the concentrations were measured by Nanodrop. 1ug total RNA was then reverse-transcribed  
758 into the first strand cDNA by SuperScript VILO Master Mix (Thermo 11755050). PowerTrack SYBR  
759 Green Master Mix (Thermo A46109) and PowerUp™ SYBR™ Green Master Mix (Thermo A25742)  
760 were used for RT-qPCR following the manufacturer's instructions.

761  
762 For flow cytometry validation, 1e6 cells of each sample were harvested and resuspended in 100ul of PBS-  
763 0.1% sodium azide-2% FBS. BV421 Mouse Anti-Human CD221 (BD 565966) and BV421 Mouse IgG1  
764 k Isotype Control (BD 562438) at the final concentration of 10 ug/ml were added, and reactions were  
765 incubated at 4 °C in the dark with rotation for 30 minutes. Cells were then washed twice using PBS-0.1%  
766 sodium azide-2% FBS, and fluorescence signals were recorded.

767

### 768 **Construction of pooled sgRNA library**

769 Genes to be included in our sgRNA library were carefully selected based on following considerations: 1)  
770 both essential and non-essential genes were included for comparison. These genes were identified using  
771 the bulk CRISPR screen data from the publication introducing the optimized CRISPRi sgRNA library<sup>29</sup>  
772 and Depmap<sup>65</sup>. For example, knocking down ribosomal genes is usually fatal. 2) To validate the ability of  
773 *PerturbSci-kinetics* to characterize gene-specific RNA dynamics, we selected genes involved in  
774 transcription, chromatin remodeling, RNA processing, and mRNA decay based on Gene Ontology terms<sup>66</sup>  
775 and KEGG pathways<sup>67</sup>. For instance, we included *CNOT2* and *CNOT3*, which are components of the key  
776 deadenylase complex for global mRNA degradation. 3) We ensured that all selected genes were expressed  
777 in the cell line to be used in our study. An in-house HEK293 EasySci-RNA dataset was used to select  
778 expressing genes that met criteria 1 and 2.

779

780 sgRNA sequences targeting genes of interest were obtained from an established optimized CRISPRi  
781 sgRNA library (only sgRNA set A was considered)<sup>29</sup>. Finally, 684 sgRNAs targeting 228 genes (3  
782 sgRNAs/gene) and 15 non-targeting controls were included in the present study.

783

784 The single-stranded sgRNA library was synthesized in a pooled manner by IDT in the following format:  
785 5'-GGCTTTATATATCTTGTGGAAAGGACGAAACACCG[20bp sgRNA plus strand  
786 sequence]GTTTAAGAGCTATGCTGGAACAGCATAGCAAGTT-3'

787

788 100ng of oligo pool was amplified by PCR using primers targeting 5' homology arm (HA) and 3' HA  
789 with limited cycles (x12) to avoid introducing amplification biases. The PCR product was purified, and  
790 double-stranded library amplicons were extracted by DNA electrophoresis and gel extraction. Then the  
791 insert was cloned into Esp3I-digested CROP-seq-opti-Puro-T2A-GFP by Gibson Assembly (50 °C for 60  
792 minutes). In parallel, a control Gibson Assembly reaction containing only the backbone was set. Both  
793 reactions were cleaned up by 0.75x AMPURE beads (Beckman Coulter A63882) and eluted in 5uL EB  
794 buffer (QIAGEN 19086), then were transformed into Endura Electrocompetent Cells (Lucigen, 602422)  
795 by electroporation (Gene Pulser Xcell Electroporation System, Bio-Rad, 1652662). After 1 hour of  
796 recovery at 250rpm, 37 °C, each reaction was spread onto an in-house 245 mm Square agarose plate  
797 (Corning, 431111) with 100ug/ml of Carbenicillin (Thermo, 10177012) and was then grown at 32 °C for  
798 13 hours to minimize potential recombination and growth biases. All colonies from each reaction were

799 scraped from the plate and the CROP-seq-opti-Puro-T2A-GFP-sgRNA plasmid library was extracted  
800 using ZymoPURE II Plasmid Midiprep Kit (Zymo, D4200). The lentiviral library was generated as stated  
801 above with extended virus production time. The step-by-step protocol is included in the supplementary  
802 materials.

803

### 804 **The pooled *PerturbSci-Kinetics* screen experiment**

805 For each replicate, 7e6 uninduced HEK293-idCas9 cells were seeded. After 12 hours, two replicates were  
806 transduced at MOI=0.1 (1000x coverage/sgRNA) and another two replicates were transduced at MOI=0.2  
807 (2000x coverage/sgRNA) with 8ug/ml of Polybrene for 24 hours. Then we replaced the culture medium  
808 with the virus-free medium and culture cells for another 24 hours. Transduced cells were selected by  
809 1.5ug/ml of Puromycin for 3 days and 1ug/ml of Puromycin for 2 days. During the selection, we passed  
810 cells every 2 or 3 days to ensure at least 1000x coverage. At the end of the drug selection, we harvested  
811 1.4e6 cells in each replicate (2000x coverage/sgRNA) as day0 samples of the bulk screen and pellet down  
812 at 500xg, 4 °C for 5 minutes. Cell pellets were stored at -80 °C for genomic DNA extraction later. Then  
813 the dCas9-KRAB-MeCP2 expression was induced by adding Dox at the final concentration of 1ug/ml,  
814 and L-glutamine+, sodium pyruvate-, high glucose DMEM was used to sensitize cells to perturbations on  
815 energy metabolism genes. Cells were cultured in this condition for additional 7 days and were passed  
816 every other day with 4000x coverage/sgRNA. On day7, 6ml of the original media from each plate was  
817 mixed with 6uL of 200mM 4sU (Sigma T4509-25MG) dissolved in DMSO (VWR 97063-136) and was  
818 put back for nascent RNA metabolic labeling. After 2 hours of treatment, 1.4e6 cells in each replicate  
819 were harvested as day7 samples of the bulk screen, and the rest of the cells were fixed and stored for  
820 single-cell *PerturbSci-Kinetics* profiling (see the next section).

821

822 Genomic DNA of bulk screen samples was extracted using Quick-DNA Miniprep Plus Kit (Zymo,  
823 D4068T) following the manufacturer's instructions and quantified by Nanodrop. All genomic DNA was  
824 used for PCR to ensure coverage. The primer targeting the U6 promoter region with P5-i5-Read1 overhang  
825 and the primer targeting the sgRNA scaffold region with P7-i7-Read2 overhang was used for generating  
826 the bulk screen libraries for sequencing.

827

### 828 **Library preparation for the *PerturbSci-Kinetics***

829 After trypsinization, cells in each 10cm dish were collected into a 15ml falcon tube and kept on ice. Cells  
830 were spun down at 300xg for 5 minutes (4 °C) and washed once in 3ml ice-cold PBS. Cells were fixed  
831 with 5ml ice-cold 4% Paraformaldehyde (PFA) in PBS (Santa Cruz Biotechnology sc-281692) for 15  
832 minutes on ice. PFA was then quenched by adding 250ul 2.5M Glycine (Sigma 50046-50G), and cells  
833 were pelleted at 500xg for 5 minutes (4 °C). Fixed cells were washed once with 1ml PBSR (PBS, 0.1%  
834 SUPERase In (Thermo AM2696), and 10mM dithiothreitol (DTT; Thermo R0861)), and were then  
835 resuspended, permeabilized, and further fixed in 1ml PBSR-triton-BS3 (PBS, 0.1% SUPERase In, 0.2%  
836 Triton-X100 (Sigma X100-500ML), 2mM bis(sulfosuccinimidyl)suberate (BS3; Thermo, PG82083),  
837 10mM DTT) for 5 minutes. Additional 4ml of PBS-BS3 (PBS, 2mM BS3, 10mM DTT) was then added  
838 to dilute Triton-X100 while keeping the concentration of BS3, and cells were incubated on ice for 15  
839 minutes. Cells were pelleted at 500xg, 4 °C for 5 minutes and resuspended in 500ul nuclease-free water  
840 (Corning 46-000-CM) supplemented with 0.1% SUPERase In and 10mM DTT. 3ml of 0.05N HCl (Fisher  
841 Chemical, SA54-1) was added for further permeabilization. After 3 minutes of incubation on ice, 3.5ml

842 Tris-HCl, pH 8.0 (Thermo 15568025), and 35ul of 10% Triton X-100 were added to each tube to neutralize  
843 the HCl. After spinning down at 4 °C, 500xg for 5 minutes, cells were finally resuspended in 400ul PSB-  
844 DTT at the concentration of ~2e6 cells/100ul (PBS, 1% SUPERase In, 1% BSA (NEB B90000S), 1mM  
845 DTT), mixed with 10% DMSO, and were slow-frozen and stored in -80 °C.

846

847 The chemical conversion was performed before the library preparation. Cells were thawed with shaking  
848 in the 37 °C water bath and spun down, then were washed once with 400ul PSB without DTT. Next, cells  
849 were resuspended in 100ul PSB, mixed with 40ul Sodium Phosphate buffer (PH 8.0, 500mM), 40ul IAA  
850 (100mM, Sigma I1149-5G), 20ul nuclease-free water, and 200ul DMSO with the order. The reaction was  
851 incubated at 50 °C for 15 minutes and was quenched by adding 8ul 1M DTT. Then cells were washed  
852 with PBS and were filtered through a 20um strainer (Pluriselect 43-10020-60). Cells were finally  
853 resuspended in 100ul PSB.

854

855 For library preparation, a step-by-step protocol is included as a supplementary file. It is worth noting that  
856 *PerturbSci-Kinetics* is based on three levels indexing and can generate more than 5.6 million barcodes in  
857 a single full-scale experiment. In contrast, sci-fate is a two-level combinatorial indexing technique with a  
858 capacity of processing ~5,000 cells in a single experiment<sup>19</sup>. scEU-seq is a "one-cell one-well" solution<sup>23</sup>  
859 with a theoretical throughput of n plates x 96/384 wells, and Drop-seq-based scNT-seq<sup>22</sup> normally  
860 processes ~10,000 cells in each run. In the present proof-of-concept screen experiment, 576,000 cells in  
861 total were loaded for reverse transcription. After the second round of indexing (ligation), 69.5% - 74.5%  
862 of cells were recovered (413,980 cells in total). ~248,388 cells were loaded for the third round of indexing,  
863 and finally 161,966 cells were computationally recovered after sequencing. The cell recovery rate of  
864 *PerturbSci-Kinetics* was significantly improved compared to 7% observed in sci-RNA-seq<sup>357</sup>.

865

#### 866 **4sU pulse/chase labeling and SLAM-seq**

867 HEK293-idCas9-sgAGO2 and sgNTC cells were induced with Dox for 7 days in 10cm dishes, during  
868 which the culture medium was replaced every 2 days to keep the stability of induction. Before harvesting  
869 cells, cells were labeled with 600uM 4sU for 20 minutes. The culture medium was then aspirated and cells  
870 were lysed by adding 600ul buffer RLT from RNeasy Mini kit with 1:100 V/V β-mercaptoethanol (Sigma  
871 M3148-250ML) to the dish. Lysate was scraped using cell scrapers (VMR 10062-906) and was then  
872 collected to a 1.5ml tube. Total RNA extraction was then done using the RNeasy Mini kit.

873

874 HEK293-idCas9-sgDROSHA, sgDICER1, and sgNTC cells were induced with Dox for 4 days in 10cm  
875 dishes. After seeded to a 6-well plate, cells were treated for another 3 days. By the end of the induction,  
876 the culture medium was replaced with Dox+ medium containing 100uM 4sU and cells were labeled for  
877 18h. The medium was refreshed every 6h to keep the 4sU concentration stable. Then cells in each well  
878 were washed with PBS carefully once and the fresh medium containing 10mM uridine (Sigma U3750-1G)  
879 was added. Following 2h and 4h incubation, the medium was aspirated and cells were lysed with 250ul  
880 buffer RLT RNeasy Mini kit with 1:100 V/V β-mercaptoethanol. Total RNA was extracted using the  
881 RNeasy Mini kit, and RNA concentrations were measured by Nanodrop. Samples were stored at -80°C  
882 before further processing.

883

884 2-5 ug of total RNA from each sample was used for chemical conversion. RNA was diluted into 15ul, and  
885 mixed with 5ul of 100mM IAA, 5ul of NaPO<sub>4</sub> (pH 8.0, 500mM) buffer, and 25ul of DMSO. The reaction  
886 was incubated at 50 °C for 15 minutes and was then quenched with 1ul 1M DTT. The RNA was purified  
887 using the Monarch RNA Cleanup Kit (NEB T2030L) and was eluted in 10ul of EB buffer. RNA  
888 concentrations were measured again using the Qubit RNA HS kit (Thermo Q32852) and samples were  
889 immediately used for library construction.

890

891 Full-length and 3' end bulk SLAM-seq were used for different experimental purposes. For full-length bulk  
892 SLAM-seq library construction, the CRISPRclean Stranded Total RNA Prep with rRNA Depletion Kit  
893 (Jumpcode Genomics KIT1014) was used. For 3' end bulk SLAM-seq library construction, an in-house  
894 3' end library preparation workflow was used. In brief, 250-500ng total mRNA was mixed with 1ul 100uM  
895 oligodT primer (ACGACGCTCTTCCGATCTNNNNNNNNNNNTTTTTTTTTTTTTTTT), 1ul 10mM each  
896 dNTP mix, 0.5ul SUPERase In and the volume was adjusted to 15ul with molecular biology grade water.  
897 The reaction was Incubated at 55C for 5min and was then cooled on ice. 4ul 5xRT buffer and 1ul Maxima  
898 H Minus Reverse Transcriptase (Thermo EP0753) were added to the reaction, and reverse transcription  
899 was performed under the following program: 25 °C for 10min, then 50 °C for 15min. After 0.6x AMPURE  
900 beads purification, 20ul eluate was mixed with 14ul water, 4ul second strand synthesis (SSS) buffer, and  
901 2ul SSS enzyme (NEB, E6111L). SSS was carried out by 1h incubation at 16 °C, then cDNA was extracted  
902 using another round of 0.6x AMPURE purification and the concentration was measured using Qubit  
903 dsDNA HS kit (Thermo Q32851). Read2 tagmentation was performed by mixing 10ng cDNA with 2xTD  
904 buffer (**Supplementary file 1**) containing 1:20 V/V Nextera Read2-Tn5 (**Supplementary file 1**) and  
905 incubating at 55 °C for 10 minutes. The reaction was quenched, and the final PCR was conducted in the  
906 same way as EasySci-RNA<sup>10</sup>. The final library was purified using 0.8x AMPURE beads.

907

### 908 **Reads processing**

909 For bulk CRISPR screen libraries, bcl files were demultiplexed into fastq files based on index 7 barcodes.  
910 Reads for each sample were further extracted by index 5 barcode matching. Then every read pair was  
911 matched against two constant sequences (Read1: 11-25bp, Read2: 11-25bp) to remove reads generated  
912 from the PCR by-product. For all matching steps, a maximum of 1 mismatch was allowed. Finally, sgRNA  
913 sequences were extracted from filtered read pairs (at 26-45bp of R1), assigned to sgRNA identities with  
914 no mismatch allowed, and read counts matrices at sgRNA and gene levels were quantified.

915

916 For *PerturbSci-Kinetics* transcriptome reads processing and whole-transcriptome/nascent transcriptome  
917 gene counting, the pipeline was developed based on *EasySci*<sup>10</sup> and *Sci-fate*<sup>19</sup> with minor modifications.  
918 After demultiplexing on index 7, Read1 were matched against a constant sequence on the sgRNA capture  
919 primer to remove unspecific priming, and cell barcodes and UMI sequences sequenced in Read1 were  
920 added to the headers of the fastq files of Read2, which were retained for further processing. After potential  
921 polyA sequences and low-quality bases were trimmed from Read2 by Trim Galore (0.6.7)<sup>68</sup>, reads were  
922 aligned to a customized reference genome consisting of a complete hg38 reference genome and the dCas9-  
923 KRAB-MeCP2 sequence from Lenti-idCas9-KRAB-MeCP2-T2A-mCherry-Neo using STAR (2.7.9a)<sup>69</sup>.  
924 Unmapped reads and reads with mapping score < 30 were filtered by samtools (1.13)<sup>70</sup>. Then  
925 deduplication at the single-cell level was performed based on the UMI sequences and the alignment  
926 location, and retained reads were split into SAM files per cell. These single-cell sam files were converted



927 into alignment tsv files using the sam2tsv function in jvarkit (d29b24f)<sup>71</sup>. To minimize the impact of  
928 sequencing errors, we set thresholds on both the quality and the quantity of mismatches. First, we only  
929 considered mismatches with the CIGAR string “M”, and soft-clipped mismatches that failed to map to the  
930 reference genome in the head or at the end of reads were removed. After mismatches overlapping with  
931 intrinsic SNPs were removed, only mismatches with quality scores > 45 were used for 4sU mutation  
932 calling, as the probability of these mismatches to be sequencing errors were lower than 10<sup>-4.5</sup> defined by  
933 the sequencer. Referred to sci-fate<sup>19</sup>, only reads with > 30% of T>C mutations among all mismatches were  
934 identified as nascent reads, and the list of reads was extracted from single-cell whole transcriptome sam  
935 files by the Picard MarkDuplicates program (2.27.4)<sup>72</sup>. Finally, single-cell whole transcriptome gene x  
936 cell count matrix and nascent transcriptome gene x cell count matrix were constructed by assigning reads  
937 to genes if the aligned coordinates overlapped with the gene locations on the genome. At the same time,  
938 single cell exonic/intronic read numbers were also counted by checking whether reads were mapped to  
939 the exonic or the intronic regions of genes. To quantify dCas9-KRAB-MeCP2 expression, a customized  
940 gtf file consisting of the complete hg38 genomic annotations and additional annotations for dCas9 was  
941 used in this step.  
942

943 Read1 and read2 of *PerturbSci-Kinetics* sgRNA libraries were matched against constant sequences  
944 respectively, allowing a maximum of 1 mismatch. For each filtered read pair, cell barcode, sgRNA  
945 sequence, and UMI were extracted from designed positions. Extracted sgRNA sequences with a maximum  
946 of 1 mismatch from the sgRNA library were accepted and corrected, and the corresponding UMI was used  
947 for deduplication. De-duplication was performed by collapsing identical UMI sequences of each  
948 individual corrected sgRNA under a unique cell barcode. Cells with overall sgRNA UMI counts higher  
949 than 10 were maintained and the sgRNA x cell count matrix was constructed.  
950

951 SLAM-seq reads were processed in a similar way with *PerturbSci-Kinetics*. In brief, for 3’ end SLAM-  
952 seq, UMI sequences in Read1 were extracted and were attached to the headers of Read2 by UMI-tools  
953 (1.1.2)<sup>73</sup>, and only read2 were further processed. After polyA and low quality base trimming by Trim  
954 Galore, reads were aligned to the hg38 reference genome by STAR. To align reads from samples with  
955 high-concentration 4sU labeling, more loose alignment parameters were used (--  
956 outFilterMatchNminOverLread 0.2 --outFilterScoreMinOverLread 0.2). Unmapped reads and reads with  
957 mapping score < 30 were filtered by samtools, and PCR duplicates in passed reads were further removed  
958 by UMI-tools. Nascent reads were identified and extracted, and gene counting on both whole  
959 transcriptome and nascent transcriptome were performed as mentioned above but at the sample level. For  
960 full-length SLAM-seq, reads were processed similarly but paired-end reads were retained. FeatureCounts  
961 (v2.0.1)<sup>74</sup> was used for gene counting on these paired-end strand-specific libraries. A full list of software  
962 and their versions were included in the **Supplementary file 4**.  
963

### 964 **Bulk screen sgRNA counts analysis**

965 For each bulk screen library, read counts of sgRNAs were normalized first by the sum of total counts to  
966 remove the biases from sequencing depth, and then the abundance of each sgRNA relative to the sum of  
967 sgNTC was calculated, assuming the NTC cells had no selection pressure during the screen. The Pearson  
968 correlations across replicates were calculated based on the relative abundances. Then the fraction changes  
969 (After vs. before the CRISPRi induction) of sgRNAs were calculated within each replicate, and the mean

970 fold changes across replicates were log<sub>2</sub> transformed. The raw counts of another external bulk CRISPRi  
971 screen dataset<sup>29</sup> was processed as stated above and the log<sub>2</sub> mean relative abundance was compared to the  
972 current study.

973

#### 974 **sgRNA singlets identification and off-target sgRNA removal**

975 In the cell mixture experiments, cells with at least 200 whole transcriptome UMIs and 200 genes detected,  
976 and unannotated reads ratio < 40% were kept. If the count of the most abundant sgRNA was at least 3-  
977 fold of the second most abundant sgRNA within this single cell, then this cell was identified as a sgRNA  
978 singlet.

979

980 In the screen dataset, cells with at least 300 whole transcriptome UMIs and 200 genes detected, and  
981 unannotated reads ratio < 40% were kept. sgRNA identities of cells were assigned and doublets were  
982 removed based on the following criteria: the cell is assigned to a single sgRNA if the most abundant  
983 sgRNA in the cell took  $\geq 60\%$  of total sgRNA counts and was at least 3-fold of the second most abundant  
984 sgRNA. Then whole transcriptomes and sgRNA profiles of single cells were integrated with the matched  
985 nascent transcriptomes.

986

987 Target genes with the number of cells perturbed  $\geq 50$  were kept for further filtering. The knockdown  
988 efficiency was calculated at the individual sgRNA level to remove potential off-target or inefficient  
989 sgRNAs: whole transcriptome counts of all cells receiving the same sgRNA were merged, normalized by  
990 the total counts, and scaled using  $1e6$  as the scale factor, then the fold changes of the target gene  
991 expressions were calculated by comparing the normalized expression levels between corresponding  
992 perturbations and NTC. sgRNAs with  $\geq 40\%$  of target gene expression reduction relative to NTC were  
993 regarded as “effective sgRNAs”, and singlets receiving these sgRNAs were kept as “on-target cells”.  
994 Downstream analyses were done at the target gene level by analyzing all cells receiving different sgRNAs  
995 targeting the same gene together.

996

#### 997 **Gene Ontology analysis of genes with high or low nascent reads ratio**

998 To validate the specificity of 4sU labeling and the computational identification of nascent reads, we  
999 identified features of gene groups with different turnover rates. Single cells were split into nascent  
000 transcriptomes and pre-existing transcriptomes, and were loaded into Seurat<sup>33</sup>. Nascent transcriptomes  
001 and pre-existing transcriptomes were normalized, scaled independently, and DEGs between the two  
002 groups were identified by FindMarkers function<sup>33</sup> with default parameters. Then GO enrichment analyses  
003 were performed using ClusterProfiler<sup>75</sup> on upregulated genes (genes with significantly higher fraction of  
004 nascent counts, FDR of 0.05) and downregulated genes (genes with significantly lower fraction of nascent  
005 counts, FDR of 0.05) respectively.

006

#### 007 **UMAP embedding on pseudo-cells**

008 The count matrix of the “on-target” cells described above was loaded into Seurat<sup>33</sup>, and DEGs of each  
009 perturbation (compared to NTC) were retrieved by FindMarkers function<sup>33</sup> with default parameters. Cells  
010 from perturbations with over one DEGs (by FindMarkers function<sup>33</sup>) were selected. We also included cells  
011 from genetic perturbations involved in similar pathways of the top perturbations. The fold changes of the  
012 normalized gene expression between perturbations and NTC were calculated, and were binned based on

013 the gene-specific expression levels in NTC. The top 3% of genes showing the highest fold changes within  
014 each bin were selected and merged as features for Principal Component Analysis (PCA). The top 9 PCs  
015 were used as input for Uniform Manifold Approximation and Projection (UMAP) embedding (min.dist =  
016 0.3, n.neighbors = 10).

017

### 018 **Differential expression analysis**

019 In *PerturbSci-Kinetics*, pairwise differential expression analyses between each perturbation and NTC cells  
020 were performed by the differentialGeneTest() function of Monocle 2<sup>76</sup>. To identify DEGs with rate  
021 changes, we selected significant hits (FDR of 5%, likelihood) with a  $\geq 1.5$ -fold expression difference  
022 and counts per million (CPM)  $\geq 5$  in at least one of the tested cell pairs. To showcase LRPPRC and  
023 miRNA pathway perturbations, more stringent criteria were used to obtain DEGs with high confidence:  
024 significant hits (FDR of 5%, likelihood) with a  $\geq 1.5$ -fold expression difference and CPM  $\geq 50$  in at  
025 least one of the tested cell pairs were kept. EdgeR was used for bulk RNAseq DEGs analysis. Genes were  
026 firstly filtered by following thresholds: 1) a minimum of 10 raw counts in at least one sample; 2) genes  
027 were expressed in at least 50% of samples in each group. Then library sizes were normalized, and  
028 differential expression analysis was conducted. P-values were corrected by the Benjamini-Hochberg  
029 method and significant hits were selected at FDR < 5% level.

030

### 031 **Synthesis and degradation rates calculation**

032 After the induction of CRISPRi for 7 days, we assumed new transcriptomic steady states had been  
033 established at the perturbation level before the 4sU labeling, and the labeling didn't disturb these new  
034 transcriptomic steady states. The following RNA dynamics differential equation is used for synthesis and  
035 degradation rates calculation similar to the previous study<sup>30</sup>:

$$036 \quad \frac{d(R)}{d(t)} = \alpha - R \cdot \beta \quad (1)$$

037 In which  $R$  is the mRNA abundance of each gene,  $\alpha$  is the synthesis rate of this gene, and  $\beta$  is the  
038 degradation rate of this gene. Since the RNA synthesis follows the zero-order kinetics and RNA  
039 degradation follows the first-order kinetics in cells,  $\frac{d(R)}{d(t)}$  is determined by  $\alpha$  and  $R \cdot \beta$ .

040 As steady states had been established, the mRNA level of each gene didn't change. We can get:

$$041 \quad \frac{d(R)}{d(t)} = 0 \quad (2)$$

$$042 \quad R = \frac{\alpha}{\beta} \quad (3)$$

043 Under the assumption that the labeling efficiency was 100%, all nascent RNA were labeled during the  
044 4sU incubation, and pre-existing RNA would only degrade. So, for nascent RNA ( $R_n$ ),  $R_n(t = 0) = 0$   
045 and  $\alpha_n = \alpha$ . For pre-existing RNA ( $R_p$ ),  $R_p(t = 0) = R = \frac{\alpha}{\beta}$  and  $\alpha_p = 0$ . Based on these boundary  
046 conditions, we could further solve the differential equation above on nascent RNA and pre-existing RNA  
047 of each gene.

$$048 \quad R_n = \frac{\alpha}{\beta} (1 - e^{-\beta \cdot t}) \quad (4)$$

$$049 \quad R_p = \frac{\alpha}{\beta} e^{-\beta \cdot t} \quad (5)$$

050

051 As both  $R$  and  $R_n$  were directly measured in *PerturbSci-Kinetics*, and cells were labeled by 4sU for 2  
052 hours ( $t = 2$ ),  $\beta$  can be calculated from equation 3 and 4. Then  $\alpha$  can be solved by equation 3.

053

054 Due to the shallow sequencing and the sparsity of the single cell expression data, synthesis and degradation  
055 rates of DEGs were calculated at the pseudo-cell level. We aggregated the expression profiles of all cells  
056 with the same target gene knockdown, normalized the expressions of genes by the sum of gene counts,  
057 and scaled the size of the total counts to  $1e6$ . Synthesis and degradation rates of DEGs in the corresponding  
058 perturbed pseudo-cell were calculated as stated above. DEGs with only nascent counts or degradation  
059 counts were excluded from further examination since their rates couldn't be estimated.

060

061 To examine the significance of synthesis and degradation rate changes upon perturbation, regarding the  
062 different cell sizes across different perturbations and NTC, which could affect the robustness of rate  
063 calculation, randomization tests were adopted. Only perturbations with cell number  $\geq 50$  were examined.  
064 For each DEG belonging to each perturbation, background distributions of the synthesis and degradation  
065 rate were generated: a subset of cells with the same size as the corresponding perturbed cells was randomly  
066 sampled from a mixed pool consisting of corresponding perturbed cells and NTC cells, then these cells  
067 were aggregated into a background pseudo-cell, and synthesis and degradation rates of the gene for testing  
068 were calculated as stated above, and the process was repeated for 500 times. Rates = 0 were assigned if  
069 only nascent counts or degradation counts were sampled during the process (referred to as invalid  
070 samplings), but only genes with less than 50 (10%) "invalid samplings" were kept for p-value calculation.  
071 The two-sided empirical p-values for the synthesis and degradation rate changes were calculated  
072 respectively by examining the occurrence of extreme values in background distributions compared to the  
073 rates from perturbed pseudo-cell. Rate changes with p-value  $\leq 0.05$  were regarded as significant, and the  
074 directions of the rate changes were determined by comparing the rates from the perturbed pseudo-cell with  
075 the background mean values. The fold changes of rates for each significant gene were calculated as follows:  
076 only NTC cells were sampled at the same size as perturbed cells and aggregated, and the background rates  
077 were calculated at the pseudo-cell level. After resampling for 200 times, these gene-specific rates were  
078 averaged. Fold changes of the rates = rates in perturbed pseudo-cell / mean rates from the NTC-only  
079 background.

080

081 Of note, in *PerturbSci-Kinetics*, we used oligo-dT primers for whole/nascent transcriptome capture, which  
082 only capture 3' ends of transcripts and allow for gene-level feature counting, and most introns within gene  
083 bodies cannot be covered. Besides, the random tagmentation at the 3' ends of the cDNA during the library  
084 preparation further confounds the 3' end exon-intron fraction, making it difficult to accurately infer the  
085 gene-specific splicing status. Additionally, splicing timings vary between different splicing sites within  
086 the same transcript<sup>77</sup>, and isoforms could have distinct splicing kinetics. Moreover, incorporating the  
087 splicing rate into our current rate estimation model is technically challenging, as the one-shot metabolic  
088 labeling design used in *PerturbSci-Kinetics* is incompatible with estimating the splicing rate  
089 mathematically. In fact, at least three labeling time points are needed to solve the differential equation for  
090 splicing rate estimation<sup>30</sup>.

091

### 092 **Global changes of key statistics upon perturbations**

093 For global synthesis and degradation rate changes, considering the noise from lowly-expressed genes, we  
094 selected top1000 highly expressed genes from NTC cells, then calculated their synthesis rates and

095 degradation rates in NTC cells and all perturbations with cell number  $\geq 50$ . KS tests were performed to  
096 compare rate distributions between each perturbation and NTC cells.

097

098 During the reads processing, the number of reads aligned to exonic/intronic regions were counted at the  
099 single cell level. Then the distributions of exonic reads percentage in nascent reads from single cells with  
100 the same target gene knockdown and NTC cells were compared using the KS tests to identify genes  
101 affecting RNA processing.

102

103 The ratio of nascent mitochondrial read counts to total mitochondrial read counts was calculated in each  
104 single cell, and the distributions of the ratio from single cells with the same target gene knockdown and  
105 NTC cells were compared using the KS tests to identify the master regulator of mitochondrial mRNA  
106 dynamics.

107

108 In all global statistics examinations, the p-values were corrected from multiple comparisons, and  
109 comparisons with  $FDR \leq 0.05$  were considered as significant. The median value from each perturbation  
110 and NTC cells were compared to determine the direction of significant changes.

111

### 112 Coverage analysis

113 To identify the potential different RISC binding patterns between synthesis/degradation-regulated DEGs  
114 in *DROSHA* and *DICER1* perturbations, we reprocessed the raw data of *Ago2* eCLIP obtained from HeLa  
115 cells (two replicates, SRR7240709 and SRR7240710) from Zhang, K et, al<sup>78</sup>. Potential adapters at 3' ends  
116 of reads were trimmed by Cutadapt<sup>79</sup>, and the first 6-base UMI were extracted and attached to headers of  
117 the reads. After STAR alignment<sup>69</sup> and samtools filtering<sup>70</sup>, only uniquely aligned reads were kept and  
118 deduplication was performed based on the UMI and mapping coordinates using UMI-tools<sup>73</sup>. Then bam  
119 files were transformed to the single-base coverage by BEDtools<sup>80</sup>. The transcript regions of genes-of-  
120 interest were reconstructed based on the hg38 genome annotation gtf file from GENCODE. Briefly, for  
121 each gene, the exonic regions were extracted and were redivided into 5'UTR, CDS, and 3'UTR by the  
122 5'most start codon and the 3'most stop codon annotated in the gtf. The *Ago2* binding coverages of these  
123 designated regions were obtained by intersection and were binned. A small background (0.1/base) was  
124 added for smoothing. The gene-specific signal in each bin was normalized by the number of bases in each  
125 bin, and the binned coverage of each gene was scaled to be within 0-1. After aggregating scaled coverages  
126 of synthesis/degradation-regulated genes respectively, the second scaling was performed to visualize the  
127 relative enrichment of *Ago2* binding at UTR compared to the CDS: fold changes of the scaled binned  
128 coverage relative to the lowest coverage value in the CDS along the aggregated transcript were calculated.

129

130 Meta-gene coverage analysis was conducted to visualize the gene body distribution of newly transcribed  
131 RNA in NTC and AGO2-knockdown samples. Genomic coordinates of protein coding genes on  
132 chromosome 1-22 and chromosome X were retrieved from the hg38 genome annotation gtf file from  
133 GENCODE in R. Gene bodies were binned into 50 bins by the tile() function in the GenomicRanges  
134 package, and an additional 200 bp bin downstream the end of genes were attached. These bins were  
135 ordered from TSS to gene ends and were exported as bed files separately by strandness using the  
136 export.bed() function in the rtracklayer package<sup>81</sup>. For input reads, two nascent reads BAM files per group  
137 from the pulse-labeling full-coverage SLAM-seq were merged using samtools, then reads with FLAG =

138 83 and 163 were extracted for coverage calculation of genes on the plus strand, and reads with FLAG =  
139 99 and 147 were extracted for coverage calculation of genes on the minus strand. The gene-specific binned  
140 coverages were counted using the bedtools intersect command. Binned counts of each gene were  
141 normalized by total counts in the gene body, and the coverage of any group of genes was finally drawn by  
142 averaging the normalized signals across genes.

143

#### 144 **Public ChIP-seq, shRNA RNA-seq, GRO-seq data analysis**

145 Genes with detectable expression were identified from shControl/shAGO2 bulk RNA-seq in ENCODE.  
146 Processed gene counts quantification tables were downloaded from the ENCODE portal (ENCSR495YSS,  
147 ENCSR898NWE). Only genes with mean transcript per million (TPM) > 1 across 4 samples and with  
148 detected expression in at least 3 of 4 samples were included. Log<sub>2</sub> fold changes of each gene upon AGO2  
149 silencing were calculated by dividing the mean TPM in the shAGO2 group with the mean TPM in the  
150 shControl group.

151

152 Ago2 ChIP-seq bam and narrow peak files from ENCODE (ENCSR151NQL) were merged and were then  
153 used to identify TSS binding of Ago2. TSS regions of genes with detectable expression (defined as  
154 upstream 2kb to downstream 2kb around TSS) were retrieved by the promoters() function in the  
155 GenomicRanges package<sup>82</sup>. Genes were classified into Ago TSS peak+/- genes based on the overlap  
156 between their TSS regions with merged Ago2 ChIP-seq narrow peaks identified by findOverlaps()  
157 function. The Ago2 binding patterns of these two groups of genes were visualized using the  
158 computeMatrix function in deepTools<sup>83</sup>, and bed files containing coordinates of corresponding TSS  
159 regions and the merged ChIP-seq bam file were used as input.

160

161 GRO-seq data was downloaded from GEO (GSM2551016, GSM2551017) and were reprocessed to depict  
162 the transcriptional pausing status of genes. 3' end of reads were trimmed against polyA by Cutadapt<sup>79</sup>, and  
163 reads were then aligned to the hg38 reference genome using Bowtie2<sup>84</sup>. After filtering out unmapped reads  
164 using samtools, bam files were imported to R. TSS proximal regions and transcriptional elongation regions  
165 of protein coding genes with gene lengths >= 1kb were extracted, and the getPausingIndices() function  
166 from the BRGenomics package<sup>85</sup> was used to calculate the pausing indices of genes. Genes detected in  
167 both replicates were ranked by the pausing index within the replicate, and an averaged rank was used to  
168 study the association with Ago2 TSS binding.

169

#### 170 **Data Availability**

171 The data generated by this study can be downloaded in raw and processed forms from the NCBI Gene  
172 Expression Omnibus (GSE218566, reviewers' token: itqlgacczrgxpm).  
173

174

#### 174 **Code Availability**

175 The computation scripts for processing *PerturbSci-Kinetics* were included as supplementary files. Scripts  
176 and the user manual are available for open access in GitHub:  
177 [https://github.com/JunyueCaoLab/PerturbSci\\_Kinetics](https://github.com/JunyueCaoLab/PerturbSci_Kinetics)  
178

179

#### 179 **Supplementary Tables (provided as Microsoft Excel files)**

180 **Supplementary Table 1:** Genes and sgRNAs included in the study. Each gene (“gene\_symbol”) has 3  
181 sgRNAs, and they were named in the format “Gene\_number” (“names”). sgRNA sequences were included  
182 in “sgRNA\_seq”. The “gene\_class” is the functional category of each gene.

183 **Supplementary Table 2:** Raw sgRNA counts of the bulk screen samples collected at different time points.  
184 Read counts of each sgRNA (“sgRNA\_name”) from 4 replicates at day 0 and day 7 were included.

185 **Supplementary Table 3:** Relative sgRNA abundance fold changes between day 7 and day 0. The  
186 “Day7\_vs\_Day0\_repX” is the fold changes of relative sgRNA abundance at the gene level (**Methods**).

187 **Supplementary Table 4:** Information about perturbations that showed significant global synthesis rate  
188 changes. The “adj.p” is the false discovery rate adjusted for multiple comparisons. The “direction” is the  
189 direction of the changes on the global synthesis rates distributions comparing perturbed cells to the NTC  
190 cells, and the “KD\_median/NTC\_median” is the quantitative measurement of the changes. The  
191 “gene\_class” is the functional category of target genes (“Perturbations”).

192 **Supplementary Table 5:** Information about perturbations that showed significant global degradation rate  
193 changes. The “adj.p” is the false discovery rate adjusted for multiple comparisons. The “direction” is the  
194 direction of the changes on the global degradation rates distributions comparing perturbed cells to the  
195 NTC cells, and the “KD\_median/NTC\_median” is the quantitative measurement of the changes. The  
196 “gene\_class” is the functional category of target genes (“Perturbations”).

197 **Supplementary Table 6:** Information about perturbations that showed significant nascent exonic reads  
198 ratio changes. The “adj.p” is the false discovery rate adjusted for multiple comparisons. The “direction”  
199 is the direction of the changes on the nascent exonic reads ratio distributions comparing perturbed cells to  
200 the NTC cells, and the “KD\_median/NTC\_median” is the quantitative measurement of the changes. The  
201 “gene\_class” is the functional category of target genes (“Perturbations”).

202 **Supplementary Table 7:** Information about perturbations that showed significant mitochondrial RNA  
203 turnover changes. The “adj.p” is the false discovery rate adjusted for multiple comparisons. The “direction”  
204 is the direction of the changes in the distributions of mitochondrial nascent/total reads ratio comparing  
205 perturbed cells to the NTC cells, and the “KD\_median/NTC\_median” is the quantitative measurement of  
206 the changes. The “gene\_class” is the functional category of target genes (“Perturbations”).

207 **Supplementary Table 8:** Steady-state expression and synthesis/degradation dynamics of mitochondrial  
208 genes upon *LRPPRC*, *NDUFS2*, *CYCI*, *BCSIL* perturbations. The “synth\_rate”, “synth\_FC”,  
209 “synth\_pval”, “synth\_direction” are the synthesis rate of the gene in the perturbed cells, the fold change  
210 of the synthesis rate of the gene in the perturbed cells compared to the NTC cells, the significance of the  
211 synthesis rate change, and the direction of the synthesis rate changes. The “deg\_rate”, “deg\_FC”,  
212 “deg\_pval”, “deg\_direction” are the degradation rate of the gene in the perturbed cells, the fold change of  
213 the degradation rate of the gene in the perturbed cells compared to the NTC cells, the significance of the  
214 degradation rate change, and the direction of the degradation rate changes. The “DEG\_qval” and  
215 “DEG\_fold.change” are the multiple comparison-corrected FDR and the fold change of the steady-state  
216 gene expression change in perturbed cells compared to the NTC cells.

217 **Supplementary Table 9:** Filtered differentially expressed genes between perturbations with cell  
218 number  $\geq 50$  and NTC. For each gene (“Gene\_symbol”), the “perturbation” is the target gene in  
219 perturbed cells. The “DEGs\_direction” is the direction of gene expression changes comparing perturbed  
220 cells to the NTC cells, and the “DEGs\_FC” is the fold change of the gene expression changes comparing  
221 perturbed cells to the NTC cells. The “max.CPM.between.KD.NTC” and “min.CPM.between.KD.NTC”  
222 are the pseudobulk expression levels of the gene that showed higher and lower expression in perturbed  
223 cells or the NTC cells. The expression level was quantified by counts per million. The “qval” is the false  
224 discovery rate (one-sided likelihood ratio test with adjustment for multiple comparisons).

225 **Supplementary Table 10:** Differentially expressed genes with significant synthesis and/or degradation  
226 changes. The “perturbations” is the target gene of the perturbed cells, and the “Gene\_symbols” is the  
227 symbols of DEGs with significant synthesis and/or degradation rate changes in corresponding  
228 perturbations. The type of significant rate change of each gene is included in the “Regulation\_type”. The  
229 “Synth\_deg\_FC”, the “Synth\_deg\_direction”, and the “Synth\_deg\_pval” reflect the fold change, the  
230 direction of the change, and the randomization test p-value of the rate indicated in the “Regulation\_type”.  
231 “DEGs\_FC”, “DEGs\_direction”, and “max.expr.between.KD.NTC” are the fold changes of gene  
232 expression, the direction of the change, and the maximum pseudobulk CPM between the corresponding  
233 perturbation and the NTC cells.

234 **Supplementary Table 11:** Steady-state expression and synthesis/degradation dynamics of merged DEGs  
235 upon *DROSHA* and *DICER1* perturbations. The “synth\_rate”, “synth\_FC”, “synth\_pval”,  
236 “synth\_direction” are the synthesis rate of the gene in the perturbed cells, the fold change of the synthesis  
237 rate of the gene in the perturbed cells compared to the NTC cells, the significance of the synthesis rate  
238 change, and the direction of the synthesis rate changes. The “deg\_rate”, “deg\_FC”, “deg\_pval”,  
239 “deg\_direction” are the degradation rate of the gene in the perturbed cells, the fold change of the  
240 degradation rate of the gene in the perturbed cells compared to the NTC cells, the significance of the  
241 degradation rate change, and the direction of the degradation rate changes. The “DEG\_fold.change” and  
242 “DEG\_qval” are the fold change of the steady-state gene expression change in perturbed cells compared  
243 to the NTC cells and the multiple comparison-corrected FDR.

## 244 **Supplementary files**

245 **Supplementary file 1:** Detailed experiment protocols for *PerturbSci-Kinetics*, including all materials and  
246 equipment needed, step-by-step descriptions, and representative gel images.

247 **Supplementary file 2:** Primer sequences used in the *PerturbSci-Kinetics* experiment. The design  
248 principles and sequences of the oligo pool library, bulk screen sequencing primer, shortdT RT primers,  
249 sgRNA capture primers, ligation primers, sgRNA inner i7 primers, and P5/P7 primers were included. The  
250 columns indicate the positions on the 96-well plate (Well positions), an identifier of the sequence (Names),  
251 the full primer sequence (Sequences), and the barcode sequence (Barcodes).

252 **Supplementary file 3:** The overall costs for *PerturbSci-Kinetics* library preparation. Reagents used in  
253 each step were included, and the costs were calculated based on the scale of the real experiment.



254 **Supplementary file 4:** Computational pipeline scripts and notes for processing *PerturbSci-Kinetics* data,  
255 from sequencer-generated files to single-cell gene count matrix.

256

257 **Reference:**

- 258 1. Jaitin, D. A. *et al.* Dissecting Immune Circuits by Linking CRISPR-Pooled Screens with Single-  
259 Cell RNA-Seq. *Cell* **167**, 1883–1896.e15 (2016).
- 260 2. Adamson, B. *et al.* A Multiplexed Single-Cell CRISPR Screening Platform Enables Systematic  
261 Dissection of the Unfolded Protein Response. *Cell* **167**, 1867–1882.e21 (2016).
- 262 3. Dixit, A. *et al.* Perturb-Seq: Dissecting Molecular Circuits with Scalable Single-Cell RNA Profiling  
263 of Pooled Genetic Screens. *Cell* **167**, 1853–1866.e17 (2016).
- 264 4. Xie, S., Duan, J., Li, B., Zhou, P. & Hon, G. C. Multiplexed Engineering and Analysis of  
265 Combinatorial Enhancer Activity in Single Cells. *Mol. Cell* **66**, 285–299.e5 (2017).
- 266 5. Datlinger, P. *et al.* Pooled CRISPR screening with single-cell transcriptome readout. *Nat. Methods*  
267 **14**, 297–301 (2017).
- 268 6. Hill, A. J. *et al.* On the design of CRISPR-based single-cell molecular screens. *Nat. Methods* **15**,  
269 271–274 (2018).
- 270 7. Replogle, J. M. *et al.* Combinatorial single-cell CRISPR screens by direct guide RNA capture and  
271 targeted sequencing. *Nat. Biotechnol.* **38**, 954–961 (2020).
- 272 8. Replogle, J. M. *et al.* Mapping information-rich genotype-phenotype landscapes with genome-scale  
273 Perturb-seq. *Cell* **185**, 2559–2575.e28 (2022).
- 274 9. Erhard, F. *et al.* Time-resolved single-cell RNA-seq using metabolic RNA labelling. *Nature*  
275 *Reviews Methods Primers* **2**, 1–18 (2022).
- 276 10. Sziraki, A. *et al.* A global view of aging and Alzheimer’s pathogenesis-associated cell population  
277 dynamics and molecular signatures in the human and mouse brains. Preprint at  
278 <https://doi.org/10.1101/2022.09.28.509825>.
- 279 11. Yeo, N. C. *et al.* An enhanced CRISPR repressor for targeted mammalian gene regulation. *Nat.*

- 280 *Methods* **15**, 611–616 (2018).
- 281 12. Rabani, M. *et al.* Metabolic labeling of RNA uncovers principles of RNA production and  
282 degradation dynamics in mammalian cells. *Nat. Biotechnol.* **29**, 436–442 (2011).
- 283 13. Cleary, M. D., Meiering, C. D., Jan, E., Guymon, R. & Boothroyd, J. C. Biosynthetic labeling of  
284 RNA with uracil phosphoribosyltransferase allows cell-specific microarray analysis of mRNA  
285 synthesis and decay. *Nat. Biotechnol.* **23**, 232–237 (2005).
- 286 14. Dolken, L. *et al.* High-resolution gene expression profiling for simultaneous kinetic parameter  
287 analysis of RNA synthesis and decay. *RNA* **14**, 1959–1972 (2008).
- 288 15. Miller, C. *et al.* Dynamic transcriptome analysis measures rates of mRNA synthesis and decay in  
289 yeast. *Mol. Syst. Biol.* **7**, 458–458 (2014).
- 290 16. Duffy, E. E. *et al.* Tracking Distinct RNA Populations Using Efficient and Reversible Covalent  
291 Chemistry. *Mol. Cell* **59**, 858–866 (2015).
- 292 17. Schwalb, B. *et al.* TT-seq maps the human transient transcriptome. *Science* **352**, 1225–1228 (2016).
- 293 18. Miller, M. R., Robinson, K. J., Cleary, M. D. & Doe, C. Q. TU-tagging: cell type-specific RNA  
294 isolation from intact complex tissues. *Nat. Methods* **6**, 439–441 (2009).
- 295 19. Cao, J., Zhou, W., Steemers, F., Trapnell, C. & Shendure, J. Sci-fate characterizes the dynamics of  
296 gene expression in single cells. *Nat. Biotechnol.* **38**, 980–988 (2020).
- 297 20. Erhard, F. *et al.* scSLAM-seq reveals core features of transcription dynamics in single cells. *Nature*  
298 **571**, 419–423 (2019).
- 299 21. Hendriks, G.-J. *et al.* NASC-seq monitors RNA synthesis in single cells. *Nat. Commun.* **10**, 3138  
300 (2019).
- 301 22. Qiu, Q. *et al.* Massively parallel and time-resolved RNA sequencing in single cells with scNT-seq.  
302 *Nat. Methods* **17**, 991–1001 (2020).
- 303 23. Battich, N. *et al.* Sequencing metabolically labeled transcripts in single cells reveals mRNA  
304 turnover strategies. *Science* **367**, 1151–1156 (2020).

- 305 24. Kawata, K. *et al.* Metabolic labeling of RNA using multiple ribonucleoside analogs enables the  
306 simultaneous evaluation of RNA synthesis and degradation rates. *Genome Res.* **30**, 1481–1491  
307 (2020).
- 308 25. Ziegenhain, C. *et al.* Comparative Analysis of Single-Cell RNA Sequencing Methods. *Mol. Cell*  
309 **65**, 631–643.e4 (2017).
- 310 26. Ding, J. *et al.* Systematic comparison of single-cell and single-nucleus RNA-sequencing methods.  
311 *Nat. Biotechnol.* **38**, 737–746 (2020).
- 312 27. Joung, J. *et al.* Genome-scale CRISPR-Cas9 knockout and transcriptional activation screening. *Nat.*  
313 *Protoc.* **12**, 828–863 (2017).
- 314 28. Schwanhäusser, B. *et al.* Global quantification of mammalian gene expression control. *Nature* **473**,  
315 337–342 (2011).
- 316 29. Sanson, K. R. *et al.* Optimized libraries for CRISPR-Cas9 genetic screens with multiple modalities.  
317 *Nat. Commun.* **9**, 5416 (2018).
- 318 30. Qiu, X. *et al.* Mapping transcriptomic vector fields of single cells. *Cell* **185**, 690–711.e45 (2022).
- 319 31. Jones, P. L. *et al.* Methylated DNA and MeCP2 recruit histone deacetylase to repress transcription.  
320 *Nat. Genet.* **19**, 187–191 (1998).
- 321 32. Dominguez, A. A., Lim, W. A. & Qi, L. S. Beyond editing: repurposing CRISPR–Cas9 for  
322 precision genome regulation and interrogation. *Nature Reviews Molecular Cell Biology* vol. 17 5–  
323 15 Preprint at <https://doi.org/10.1038/nrm.2015.2> (2016).
- 324 33. Stuart, T. *et al.* Comprehensive Integration of Single-Cell Data. *Cell* **177**, 1888–1902.e21 (2019).
- 325 34. Colgan, D. F. & Manley, J. L. Mechanism and regulation of mRNA polyadenylation. *Genes &*  
326 *Development* vol. 11 2755–2766 Preprint at <https://doi.org/10.1101/gad.11.21.2755> (1997).
- 327 35. Kikkawa, S. *et al.* Conversion of GDP into GTP by nucleoside diphosphate kinase on the GTP-  
328 binding proteins. *J. Biol. Chem.* **265**, 21536–21540 (1990).
- 329 36. Kim, S. H. & Lin, R. J. Pre-mRNA splicing within an assembled yeast spliceosome requires an

- 330 RNA-dependent ATPase and ATP hydrolysis. *Proc. Natl. Acad. Sci. U. S. A.* **90**, 888–892 (1993).
- 331 37. Iwakawa, H.-O. & Tomari, Y. Life of RISC: Formation, action, and degradation of RNA-induced  
332 silencing complex. *Mol. Cell* **82**, 30–43 (2022).
- 333 38. Van Nostrand, E. L. *et al.* A large-scale binding and functional map of human RNA-binding  
334 proteins. *Nature* **583**, 711–719 (2020).
- 335 39. ENCODE Project Consortium *et al.* Expanded encyclopaedias of DNA elements in the human and  
336 mouse genomes. *Nature* **583**, 699–710 (2020).
- 337 40. Chen, L. *et al.* R-ChIP Using Inactive RNase H Reveals Dynamic Coupling of R-loops with  
338 Transcriptional Pausing at Gene Promoters. *Mol. Cell* **68**, 745–757.e5 (2017).
- 339 41. Core, L. J. & Lis, J. T. Transcription regulation through promoter-proximal pausing of RNA  
340 polymerase II. *Science* **319**, 1791–1792 (2008).
- 341 42. Herzog, V. A. *et al.* Thiol-linked alkylation of RNA to assess expression dynamics. *Nat. Methods*  
342 **14**, 1198–1204 (2017).
- 343 43. Siira, S. J. *et al.* LRPPRC-mediated folding of the mitochondrial transcriptome. *Nat. Commun.* **8**,  
344 1532 (2017).
- 345 44. Paulo, E. *et al.* Brown adipocyte ATF4 activation improves thermoregulation and systemic  
346 metabolism. *Cell Rep.* **36**, 109742 (2021).
- 347 45. Buccitelli, C. & Selbach, M. mRNAs, proteins and the emerging principles of gene expression  
348 control. *Nat. Rev. Genet.* **21**, 630–644 (2020).
- 349 46. Treiber, T., Treiber, N. & Meister, G. Regulation of microRNA biogenesis and its crosstalk with  
350 other cellular pathways. *Nat. Rev. Mol. Cell Biol.* **20**, 5–20 (2019).
- 351 47. Kim, Y.-K., Kim, B. & Kim, V. N. Re-evaluation of the roles of DROSHA, Exportin 5, and  
352 DICER in microRNA biogenesis. *Proc. Natl. Acad. Sci. U. S. A.* **113**, E1881–9 (2016).
- 353 48. Chipman, L. B. & Pasquinelli, A. E. miRNA Targeting: Growing beyond the Seed. *Trends Genet.*  
354 **35**, 215–222 (2019).

- 355 49. Heinrichs, A. A slice of the action. *Nat. Rev. Mol. Cell Biol.* **5**, 677–677 (2004).
- 356 50. Lytle, J. R., Yario, T. A. & Steitz, J. A. Target mRNAs are repressed as efficiently by microRNA-  
357 binding sites in the 5' UTR as in the 3' UTR. *Proc. Natl. Acad. Sci. U. S. A.* **104**, 9667–9672  
358 (2007).
- 359 51. Butler, A., Hoffman, P., Smibert, P., Papalexi, E. & Satija, R. Integrating single-cell transcriptomic  
360 data across different conditions, technologies, and species. *Nat. Biotechnol.* **36**, 411–420 (2018).
- 361 52. Futschik, M. E. & Carlisle, B. Noise-robust soft clustering of gene expression time-course data. *J.*  
362 *Bioinform. Comput. Biol.* **3**, 965–988 (2005).
- 363 53. Hughes, J. R. *et al.* A microtubule interactome: complexes with roles in cell cycle and mitosis.  
364 *PLoS Biol.* **6**, e98 (2008).
- 365 54. Miyoshi, H., Blömer, U., Takahashi, M., Gage, F. H. & Verma, I. M. Development of a self-  
366 inactivating lentivirus vector. *J. Virol.* **72**, 8150–8157 (1998).
- 367 55. Liscovitch-Brauer, N. *et al.* Profiling the genetic determinants of chromatin accessibility with  
368 scalable single-cell CRISPR screens. *Nat. Biotechnol.* **39**, 1270–1277 (2021).
- 369 56. Mimitou, E. P. *et al.* Multiplexed detection of proteins, transcriptomes, clonotypes and CRISPR  
370 perturbations in single cells. *Nat. Methods* **16**, 409–412 (2019).
- 371 57. Cao, J. *et al.* The single-cell transcriptional landscape of mammalian organogenesis. *Nature* **566**,  
372 496–502 (2019).
- 373 58. Scarpulla, R. C., Vega, R. B. & Kelly, D. P. Transcriptional integration of mitochondrial  
374 biogenesis. *Trends Endocrinol. Metab.* **23**, 459–466 (2012).
- 375 59. Pakos-Zebrucka, K. *et al.* The integrated stress response. *EMBO Rep.* **17**, 1374–1395 (2016).
- 376 60. Aibar, S. *et al.* SCENIC: single-cell regulatory network inference and clustering. *Nat. Methods* **14**,  
377 1083–1086 (2017).
- 378 61. La Torre, A., Georgi, S. & Reh, T. A. Conserved microRNA pathway regulates developmental  
379 timing of retinal neurogenesis. *Proc. Natl. Acad. Sci. U. S. A.* **110**, E2362–70 (2013).

- 380 62. Janowski, B. A. *et al.* Involvement of AGO1 and AGO2 in mammalian transcriptional silencing.  
381 *Nat. Struct. Mol. Biol.* **13**, 787–792 (2006).
- 382 63. Griffin, K. N. *et al.* Widespread association of the Argonaute protein AGO2 with meiotic  
383 chromatin suggests a distinct nuclear function in mammalian male reproduction. *Genome Res.* **32**,  
384 1655–1668 (2022).
- 385 64. Moshkovich, N. *et al.* RNAi-independent role for Argonaute2 in CTCF/CP190 chromatin insulator  
386 function. *Genes Dev.* **25**, 1686–1701 (2011).
- 387 65. Pacini, C. *et al.* Integrated cross-study datasets of genetic dependencies in cancer. *Nat. Commun.*  
388 **12**, 1661 (2021).
- 389 66. Ashburner, M. *et al.* Gene ontology: tool for the unification of biology. The Gene Ontology  
390 Consortium. *Nat. Genet.* **25**, 25–29 (2000).
- 391 67. Kanehisa, M. & Goto, S. KEGG: kyoto encyclopedia of genes and genomes. *Nucleic Acids Res.* **28**,  
392 27–30 (2000).
- 393 68. Krueger, F. A wrapper around Cutadapt and FastQC to consistently apply adapter and quality  
394 trimming to FastQ files, with extra functionality for RRBS data. *TrimGalore* (accessed on 27  
395 August 2019).
- 396 69. Dobin, A. *et al.* STAR: ultrafast universal RNA-seq aligner. *Bioinformatics* **29**, 15–21 (2013).
- 397 70. Danecek, P. *et al.* Twelve years of SAMtools and BCFtools. *Gigascience* **10**, (2021).
- 398 71. Lindenbaum, P. JVarkit: java-based utilities for Bioinformatics. (2015)  
399 doi:10.6084/m9.figshare.1425030.v1.
- 400 72. Picard. <https://broadinstitute.github.io/picard/>.
- 401 73. Smith, T., Heger, A. & Sudbery, I. UMI-tools: modeling sequencing errors in Unique Molecular  
402 Identifiers to improve quantification accuracy. *Genome Research* vol. 27 491–499 Preprint at  
403 <https://doi.org/10.1101/gr.209601.116> (2017).
- 404 74. Liao, Y., Smyth, G. K. & Shi, W. featureCounts: an efficient general purpose program for

- 405 assigning sequence reads to genomic features. *Bioinformatics* **30**, 923–930 (2014).
- 406 75. Guangchuang Yu [aut, cre], Li-Gen Wang [ctb], Giovanni Dall’Olio [ctb] (formula interface of  
407 compareCluster). *clusterProfiler*. (Bioconductor, 2017).  
408 doi:10.18129/B9.BIOC.CLUSTERPROFILER.
- 409 76. Qiu, X. *et al.* Reversed graph embedding resolves complex single-cell trajectories. *Nat. Methods*  
410 **14**, 979–982 (2017).
- 411 77. Zeng, Y. *et al.* Profiling lariat intermediates reveals genetic determinants of early and late co-  
412 transcriptional splicing. *Mol. Cell* **82**, 4681–4699.e8 (2022).
- 413 78. Zhang, K. *et al.* A novel class of microRNA-recognition elements that function only within open  
414 reading frames. *Nat. Struct. Mol. Biol.* **25**, 1019–1027 (2018).
- 415 79. Martin, M. Cutadapt removes adapter sequences from high-throughput sequencing reads.  
416 *EMBnet.journal* **17**, 10–12 (2011).
- 417 80. Quinlan, A. R. & Hall, I. M. BEDTools: a flexible suite of utilities for comparing genomic features.  
418 *Bioinformatics* **26**, 841–842 (2010).
- 419 81. Gentleman, M. L. V. C. *rtracklayer*. (Bioconductor, 2017).  
420 doi:10.18129/B9.BIOC.RTRACKLAYER.
- 421 82. P. Aboyoun, H. Pagès, and M. Lawrence. *GenomicRanges*. (Bioconductor, 2017).  
422 doi:10.18129/B9.BIOC.GENOMICRANGES.
- 423 83. Ramírez, F. *et al.* deepTools2: a next generation web server for deep-sequencing data analysis.  
424 *Nucleic Acids Res.* **44**, W160–5 (2016).
- 425 84. Langmead, B. & Salzberg, S. L. Fast gapped-read alignment with Bowtie 2. *Nat. Methods* **9**, 357–  
426 359 (2012).
- 427 85. DeBerardine, M. *BRGenomics*. (Bioconductor, 2020). doi:10.18129/B9.BIOC.BRGENOMICS.
- 428
